# Supplementary material for: Encoding BRAF inhibitor functions in protein degraders
Source: Royal Society of Chemistry journal article supplement (doi:10.1039/d2md00064d), 2022-01-01
Supplement: d2md00064d1.pdf [file d2md00064d1.pdf]

Supplementary Information

## **Encoding BRAF Inhibitor Functions in Protein Degraders**

Daniel S. J. Miller,<sup>a</sup> Sabine A. Voell,<sup>b</sup> Izidor Sosič,<sup>c</sup> Matic Proj,<sup>c</sup>  
Olivia W. Rossanese,<sup>a</sup> Gregor Schnakenburg,<sup>d</sup> Michael Gütschow,<sup>b</sup>  
Ian Collins,<sup>a</sup> and Christian Steinebach<sup>\*,b</sup>

<sup>a</sup> *Cancer Research UK Cancer Therapeutics Unit at The Institute of Cancer Research,  
London SW7 3RP, United Kingdom*

<sup>b</sup> *Pharmaceutical Institute, Pharmaceutical & Medicinal Chemistry, University of Bonn,  
D-53121 Bonn, Germany*

<sup>c</sup> *Faculty of Pharmacy, University of Ljubljana, SI-1000 Ljubljana, Slovenia*

<sup>d</sup> *Institute of Inorganic Chemistry, University of Bonn, D-53121 Bonn, Germany.*

# Table of Content

|                                                        |           |
|--------------------------------------------------------|-----------|
| <b>Supplementary Tables and Figures .....</b>          | <b>3</b>  |
| <b>Supplementary Information: Biochemistry .....</b>   | <b>8</b>  |
| A. Kinase inhibition assay.....                        | 8         |
| B. Cell lines.....                                     | 8         |
| C. Immunoblotting.....                                 | 8         |
| D. Cell viability assay.....                           | 9         |
| E. Computational studies.....                          | 9         |
| <b>Supplementary Information: Chemistry.....</b>       | <b>10</b> |
| F. Molecular descriptor calculations.....              | 10        |
| G. logD measurements .....                             | 10        |
| H. Plasma protein binding studies .....                | 10        |
| I. Synthesis: general remarks .....                    | 11        |
| J. Synthesis: procedures.....                          | 12        |
| K. Crystallographic data and structure refinement..... | 39        |
| L. Selected NMR and LC/MS traces.....                  | 42        |
| <b>References .....</b>                                | <b>49</b> |

## Supplementary Tables and Figures

| 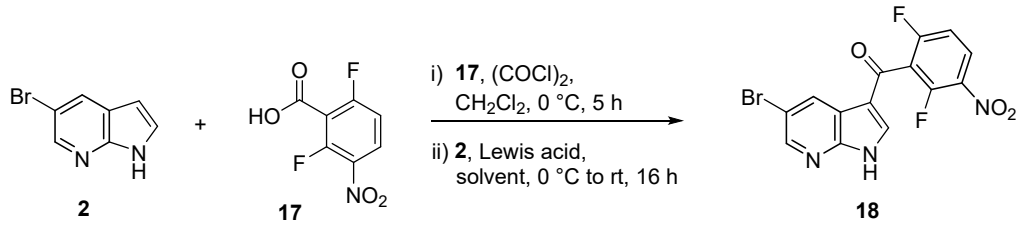 |                |                                              |                                     |                              |
|------------------------------------------------------------------------------------|----------------|----------------------------------------------|-------------------------------------|------------------------------|
| <b>2</b>                                                                           | <b>17</b>      | Lewis acid                                   | solvent                             | yield <b>18</b> <sup>a</sup> |
| 1.0 Eq.                                                                            | 1.0 Eq.        | 5.0 Eq. AlCl <sub>3</sub> <sup>b</sup>       | dry CH <sub>2</sub> Cl <sub>2</sub> | 13%                          |
| 1.0 Eq.                                                                            | 1.0 Eq.        | <b>5.0 Eq. ZrCl<sub>4</sub></b> <sup>c</sup> | dry CH <sub>2</sub> Cl <sub>2</sub> | 10%                          |
| 1.0 Eq.                                                                            | 1.0 Eq.        | 5.0 Eq. AlCl <sub>3</sub>                    | <b>1,2-DCE</b>                      | 9%                           |
| 1.0 Eq.                                                                            | <b>4.0 Eq.</b> | 5.0 Eq. AlCl <sub>3</sub>                    | dry CH <sub>2</sub> Cl <sub>2</sub> | 4%                           |
| <b>1.5 Eq.</b>                                                                     | 1.0 Eq.        | 5.0 Eq. AlCl <sub>3</sub>                    | dry CH <sub>2</sub> Cl <sub>2</sub> | 31%                          |
| 1.5 Eq.                                                                            | 1.0 Eq.        | <b>7.5 Eq. AlCl<sub>3</sub></b>              | dry CH <sub>2</sub> Cl <sub>2</sub> | 49%                          |

**Table S1:** Reaction optimization for the key entry step towards functionalized azaindoles. <sup>a</sup> Isolated yields after purification by column chromatography. <sup>b</sup> It has been suggested that azaindoles are highly coordinated by at least three molecules AlCl<sub>3</sub>.<sup>1</sup> Accordingly, a high excess of Lewis acid is needed to accelerate the reaction. <sup>c</sup> Guchhait *et al.*<sup>2</sup> reported on the ZrCl<sub>4</sub>-mediated regio- and chemoselective Friedel-Crafts acylation of indoles.

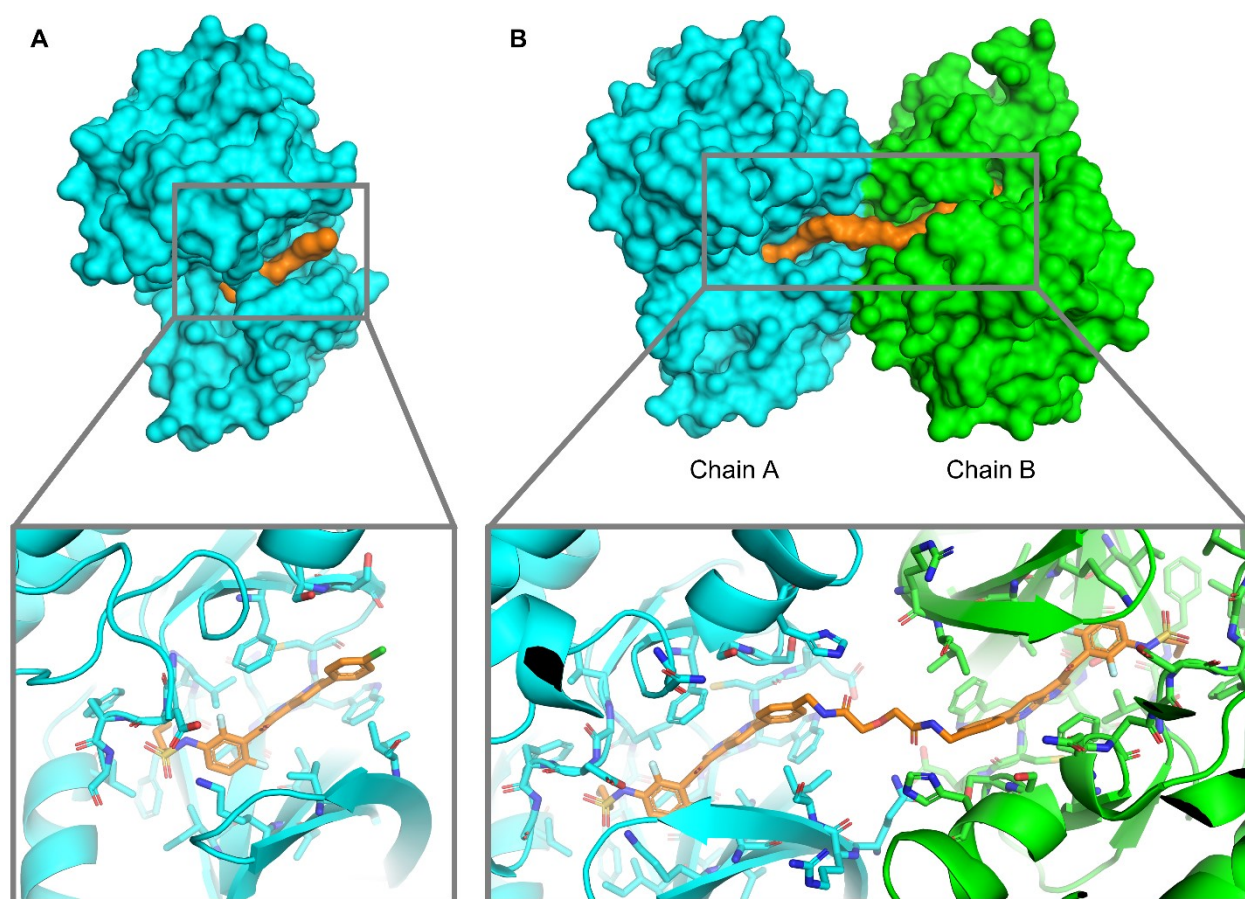

**Figure S1:** BRAF<sup>V600E</sup> in complex (A) with vemurafenib (PDB 3OG7)<sup>3</sup> and (B) with a homodimeric vemurafenib derivative (PDB 5JT2).<sup>4</sup>

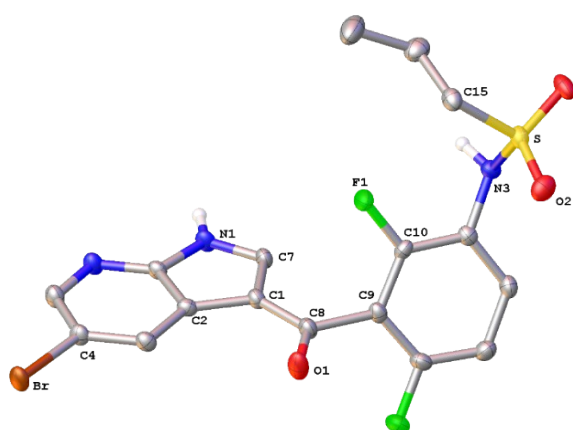

**Figure S2:** Molecular plot of the X-ray crystal structure of acylated azaindole **3** demonstrating that the Friedel-Crafts acylation occurred at the correct position.

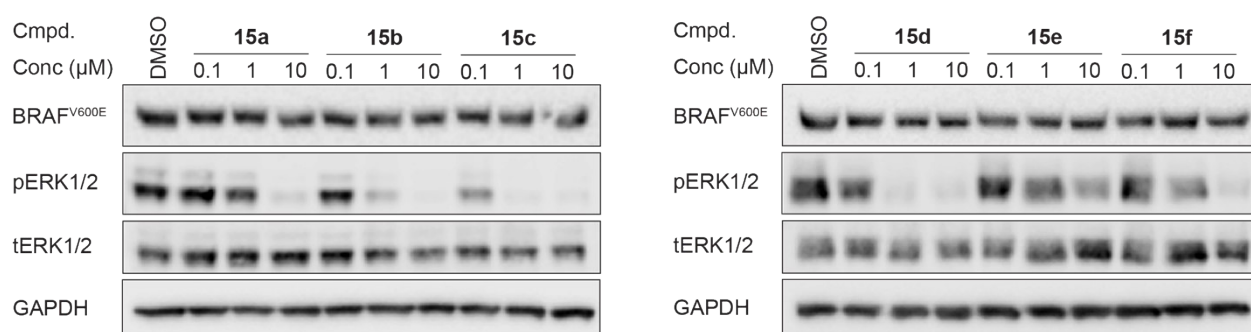

**Figure S3:** PROTACs **15a** to **15f** inhibit ERK signalling in SK-MEL-28 cells, but do not degrade BRAF<sup>V600E</sup>. Cells were treated with compounds for 4 h at the concentration indicated.

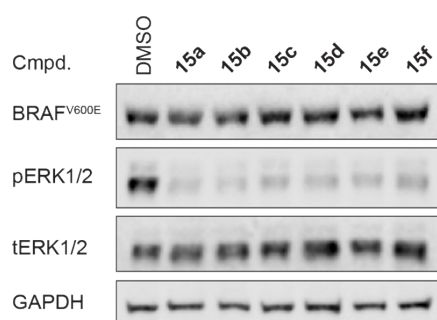

**Figure S4:** Experiment with prolonged treatment time. SK-MEL-28 cells were treated with 10 μM of the compounds for 24 h.

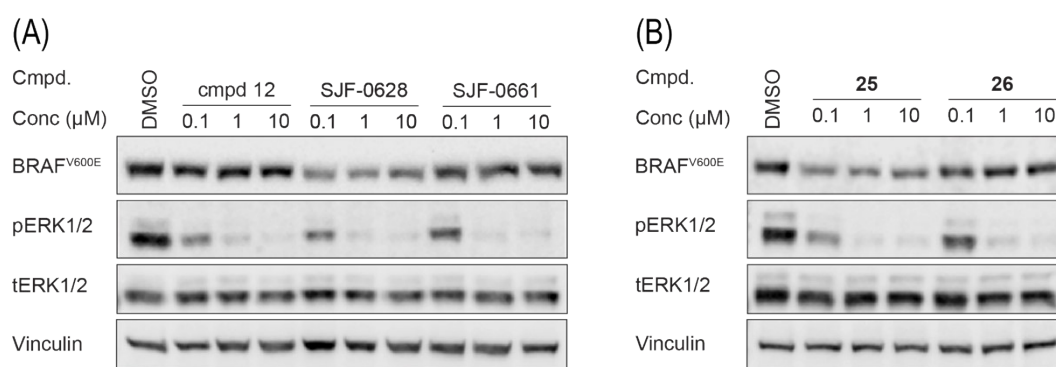

**Figure S5:** Vemurafenib-based PROTACs were evaluated against paradox breaker-based PROTACs in SK-MEL-28 cells. (A) The CRBN-hijacking PROTAC **cmpd 12**, the VHL-targeting PROTAC **SJF-0628**, as well as its negative control (**SJF-0661**) were used to treat SK-MEL-28 cells for 4 h at the dose indicated; (B) The paradox-breaker PROTAC **25** (PLX7683-based), but not compound **26** (PLX7904-based) cause BRAF<sup>V600E</sup> degradation in SK-MEL-28 cells after a 4 h treatment at the concentration indicated.

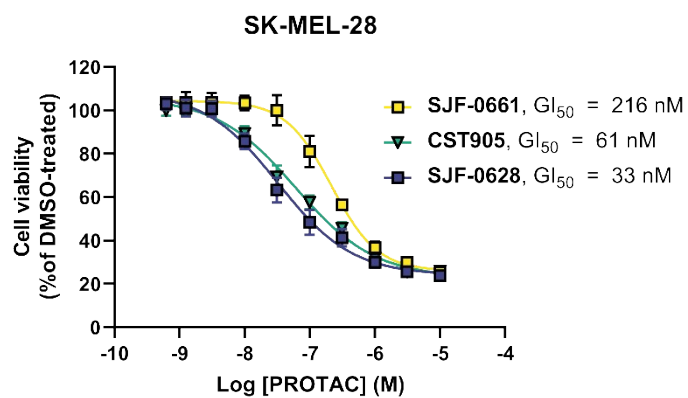

**Figure S6:** CellTiter-Glo luminescent cell viability assay performed in SK-MEL-28 cells after 120 h treatment with the indicated compounds. Data is represented as mean $\pm$ s.d. (n=3).

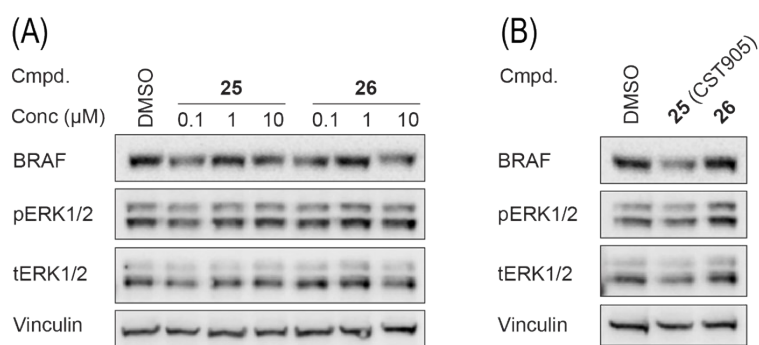

**Figure S7:** Paradox-breakers **25** and **26** do not enhance ERK signaling in the NRAS mutant cell line SK-N-AS. (A) Cells were treated with PROTACs for 4 h at the dose indicated. (B) Prolonged treatment time (24 h) and increased concentration (10 μM) was used.

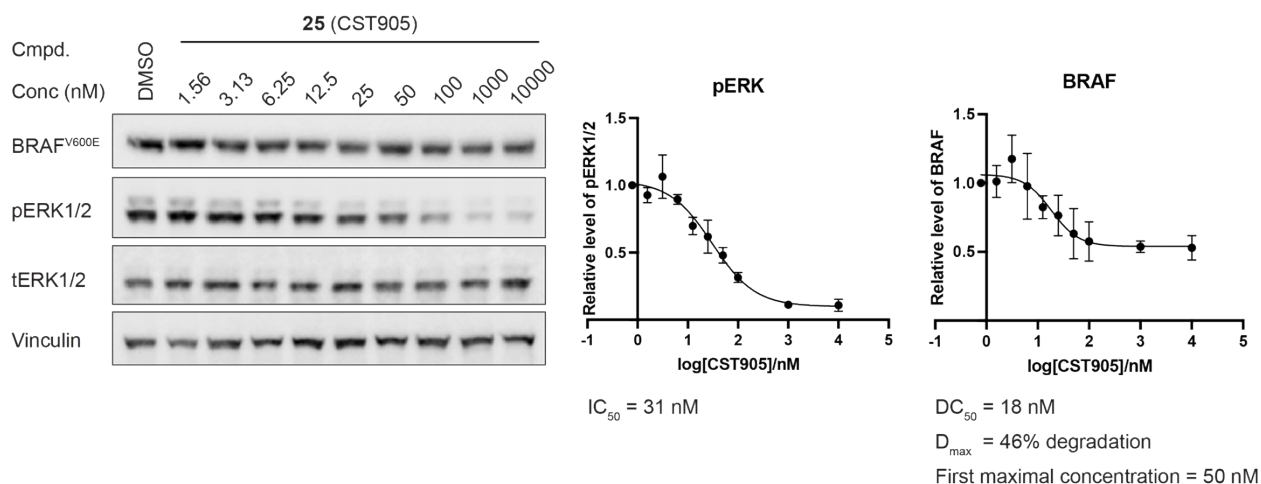

**Figure S8:** Dose-dependent analysis of BRAF<sup>V600E</sup> degradation and inhibition of ERK phosphorylation in SK-MEL-28 cells. Cells were treated for 4 h with PROTAC 25 (CST905) at the dose indicated. Quantified values represent mean of five independent repeats.

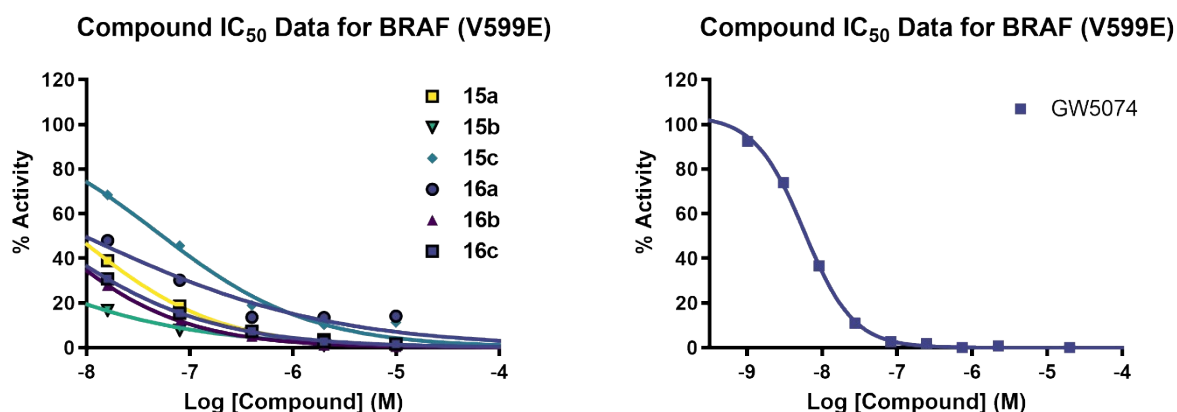

|                       | 15a     | 15b     | 15c     | 16a     | 16b     | 16c     | GW5074 |
|-----------------------|---------|---------|---------|---------|---------|---------|--------|
| Hill Slope            | -0.6493 | -0.4317 | -0.5875 | -0.3718 | -0.6447 | -0.5497 | -1.321 |
| IC <sub>50</sub> (nM) | 8.5     | 0.31    | 48      | 10      | 3.4     | 3.8     | 5.8    |

**Figure S9:** Determination of compound inhibition of BRAF V599E (HGNC BRAF V600E) in a radiometric functional kinase assay (<https://www.reactionbiology.com/services/kinase-assays/kinase-screening>). Single determinations of IC<sub>50</sub> with 10 μM [<sup>33</sup>P]-ATP and 1 μM substrate peptide. Curve fits to estimate IC<sub>50</sub> were performed where the enzyme activities at the highest concentration of compounds were less than 65%.

## Supplementary Information: Biochemistry

### A. Kinase inhibition assay

Compounds were assayed for inhibition of BRAF V599E (HGNC reference BRAF V600E) kinase activity in a commercial screening service (HotSpot™, Reaction Biology Corporation, Malvern, PA, USA) <https://www.reactionbiology.com/services/kinase-assays/kinase-screening> (accessed 13 Feb 2022). In brief, substrate peptide (MEK1 (K97R), 1  $\mu$ M) phosphorylation was quantified following transfer of [<sup>33</sup>P]-labelled phosphate from radio-labelled ATP (10  $\mu$ M) using a filter membrane protocol.<sup>5</sup> Compounds were tested in 5-dose IC<sub>50</sub> mode with a 5-fold serial dilution starting at 10  $\mu$ M (see Figure S9). Control compound, GW5074, was tested in 10-dose IC<sub>50</sub> mode with 3-fold serial dilution starting at 20  $\mu$ M. Curve fits were performed where the enzyme activities at the highest concentration of compounds were less than 65%.

### B. Cell lines

The human melanoma cell line SK-MEL-28 and the human neuroblastoma cell line SK-N-AS were used throughout this study. SK-MEL-28 were a gift from Cell Services at the Francis Crick Institute. SK-N-AS cells were obtained from ECACC. Both cell lines were certified negative for mycoplasma and were authenticated by short tandem repeat profiling. Both cell lines were maintained in Dulbecco's Modified Eagle Medium (Thermo Fisher Scientific), supplemented with 10% fetal calf serum (FCS, Thermo Fisher Scientific), and incubated at 37°C and 5% CO<sub>2</sub>.

### C. Immunoblotting

For immunoblotting, cells were plated at a density of 100,000 cells per well in 6 well plates (Falcon), incubated for 48h and treated as indicated. Cells were lysed in D0.4 lysis buffer (20 mM HEPES pH 7.5, 10% Glycerol, 0.4 M KCl, 0.4% Triton X-100, 15 mM EDTA) supplemented with cOmplete Mini Protease Inhibitor Cocktail (Sigma Aldrich) and PhosSTOP phosphatase inhibitors (Sigma Aldrich) and clarified lysates run on NuPAGE 4-12% Bis-Tris gels before transfer to Immobilon-P or -FL PVDF membrane (Merck Millipore). Immunoblotting was performed with the following antibodies: B-RAF (Cell Signaling Technology, Cat. # 14814, 1:1000), Phospho-ERK1/2 (Cell Signaling Technology, Cat. # 4370), ERK1/2 (Cell Signaling Technology, Cat # 4696, 1:1000), Phospho-MEK1/2 (Cell Signaling Technology, Cat. # 9154, 1:1000), MEK (Cell Signaling Technology, Cat. # 9122, 1:1000), GAPDH (Cell Signaling Technology, Cat. #

97166, 1:5000) and Vinculin (Sigma V9624, 1:5000). Western blots were visualised using a LI-COR Odyssey and quantified with ImageJ. For quantifications, densitometry measurements were normalised to loading controls and are shown relative to DMSO-treated cells. DC<sub>50</sub> calculation was performed using GraphPad Prism, fitting a curve to the data using the log(inhibitor) vs. response -- variable slope (four parameters) function.

#### **D. Cell viability assay**

For cell viability assays, SK-MEL-28 cells were plated at 400 cells per well in wells of two white 384-well plates (Corning). After 24h, a CellTiter-Glo® Luminescent Cell Viability assay was performed on one plate to give T<sub>0</sub> readings. On the other plate, an Echo 650 Liquid Handler (Labcyte) was used to dispense compounds at the indicated final concentrations. Cells were incubated for 5 days and a CellTiter-Glo® Luminescent Cell Viability assay was performed. Luminescence readings were normalised to DMSO controls and curve fitting and GI<sub>50</sub> calculation performed with GraphPad Prism, using the log(inhibitor) vs. response -- Variable slope (four parameters) function.

#### **E. Computational studies**

Figures 2 and S1 were created using PyMOL (The PyMOL Molecular Graphics System, Version 2.5.2, Schrödinger, LLC).

## Supplementary Information: Chemistry

### F. Molecular descriptor calculations

Predicted values for the topological polar surface area (TPSA) were calculated using SwissADME (Swiss Institute of Bioinformatics).<sup>6</sup>

### G. logD measurements

The determination of the  $\log D_{7.4}$  values was performed by a chromatographic method as described previously.<sup>7–9</sup> The system was calibrated by plotting the retention times of six different drugs (atenolol, metoprolol, labetalol, diltiazem, triphenylene, permethrin) versus their literature known  $\log D_{7.4}$  in a calibration line ( $R^2 = 0.99$ ). Subsequently, the mean retention times of the analytes were taken to calculate their  $\log D_{7.4}$  values with aid of the calibration line. At least two independent measurements of each analyte were performed.

### H. Plasma protein binding studies

Plasma protein binding (%PPB) was estimated by correlating the logarithmic retention times of the analytes on a CHIRALPAK HSA 50 × 3 mm, 5  $\mu$ m column with the literature known %PPB values (converted into  $\log K$  values) of the following drugs: warfarin, ketoprofen, budesonide, nizatidine, indomethacin, acetylsalicylic acid, carbamazepine, piroxicam, nicardipine, and cimetidine (for details, see Valko *et al.*<sup>10</sup>). Samples were dissolved in MeCN/DMSO 9:1 to achieve a final concentration of 0.5 mg/mL. The mobile phase A was 50 mM ammonium acetate adjusted to pH 7.4 with ammonia solution, while mobile phase B was *i*PrOH. The flow rate was set to 1.0 mL/min, the UV detector was set to 254 nm, and the column temperature was kept at 30 °C. After injecting 2  $\mu$ L of the sample, a linear gradient from 100% A to 30% *i*PrOH in 5.4 min was applied. From 5.4 to 18 min, 30% *i*PrOH was kept, followed by switching back to 100% A in 1.0 min and a re-equilibration time of 6 min. With the aid of the calibration line ( $R^2 = 0.94$ ), the  $\log K$  values of new substances were calculated and converted to their %PPB values. At least two independent measurements of each analyte were performed.

## I. Synthesis: general remarks

Preparative column chromatography was performed using Merck silica gel 60 (0.063 – 0.200 mm) or using an automated flash chromatography system puriFlash XS 520Plus. Melting points were determined on a Büchi 510 oil bath apparatus or on a Reichelt hot-stage apparatus and were uncorrected.  $^1\text{H}$  NMR and  $^{13}\text{C}$  NMR spectra were recorded on a Bruker Avance 500 MHz NMR spectrometer or on a Bruker Avance III 600 MHz NMR spectrometer, respectively. NMR spectra were processed and analyzed in MestReNova. Chemical shifts are given in parts per million (ppm), coupling constants  $J$  are given in Hertz, and spin multiplicities are given as s (singlet), d (doublet), t (triplet), q (quartet) or m (multiplet). In case of overlapping extraneous solvent peaks, multiplet analyses in  $^1\text{H}$  NMR spectra were performed using qGSD (quantitative Global Spectral Deconvolution). Resonance assignments were made on the basis of one- and two-dimensional NMR techniques which include  $^1\text{H}$ ,  $^{13}\text{C}$ , DEPT, HSQC, and HMBC experiments. HRMS was recorded on a micrOTOF-Q mass spectrometer (Bruker) with ESI-source coupled with an HPLC Dionex UltiMate 3000 (Thermo Scientific). The purity and identity of compounds were determined on an Infinity Lab LC/MSD-system (Agilent) with ESI-source coupled with a HPLC 1260 Infinity II (Agilent) using a EC50/2 Nucleodur C18 Gravity 3  $\mu\text{m}$  column (Macherey-Nagel). The column temperature was 40 °C. HPLC conditions started with 90%  $\text{H}_2\text{O}$  containing 2 mM  $\text{NH}_4\text{Ac}$ . The gradient ramped up to 100% MeCN in 10 min, followed by further flushing with 100% MeCN for 5 min. The flow rate was 0.5 mL/min. The samples were dissolved in  $\text{H}_2\text{O}$ , MeOH or MeCN (approx. 1 mg/mL), and 2  $\mu\text{L}$  sample solution was injected. Positive total ion scans were observed from 100–1000  $m/z$  (or more if necessary) and UV absorption was detected from 190–600 nm using a diode array detector (DAD). The purity was determined at 220–600 nm.

## J. Synthesis: procedures

### ***N*-[3-(5-Bromo-1*H*-pyrrolo[2,3-*b*]pyridine-3-carbonyl)-2,4-difluoro-phenyl]propane-1-sulfonamide (**3**)<sup>11</sup>**

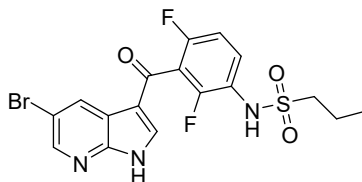

2,6-Difluoro-3-(propylsulfonamido)benzoic acid (**1**, 5.58 g, 20 mmol) was dissolved in dry CH<sub>2</sub>Cl<sub>2</sub> (100 mL). Oxalyl chloride (2M in CH<sub>2</sub>Cl<sub>2</sub>, 30 mL, 60 mmol) and dry DMF (5 drops) were added and the mixture was stirred under argon atmosphere for 5 h. The solvent was removed under reduced pressure. 5-Bromo-7-azaindole (**2**, 5.92 g, 30 mmol) was suspended in dry CH<sub>2</sub>Cl<sub>2</sub> (150 mL) and AlCl<sub>3</sub> (20.0 g, 150 mmol) was added in portions at 0 °C. Subsequently, the *in situ* generated acid chloride in dry CH<sub>2</sub>Cl<sub>2</sub> (50 mL) was added dropwise, and the reaction mixture was stirred for 18 h under argon and was allowed to warm up to rt slowly. Subsequently, the mixture was poured onto a mixture of ice-cold brine and saturated NaHCO<sub>3</sub> solution. It was extracted with EtOAc (3 × 300 mL), washed with H<sub>2</sub>O (200 mL) and brine (200 mL), dried over Na<sub>2</sub>SO<sub>4</sub>, filtered and evaporated. After purification by column chromatography (gradient of petroleum ether/EtOAc 1:1 to EtOAc), **3** was obtained as a pale brown solid.

Yield (6.42 g, 70%); *R*<sub>f</sub> = 0.49 (petroleum ether/EtOAc 1:1); mp 242 – 244 °C; <sup>1</sup>H NMR (600 MHz, DMSO-*d*<sub>6</sub>) δ 0.96 (t, *J* = 7.4 Hz, 3H), 1.75 (hept, *J* = 8.3, 7.5 Hz, 2H), 3.17 – 3.10 (m, 2H), 7.28 (t, *J* = 8.7 Hz, 1H), 7.59 (td, *J* = 9.0, 5.7 Hz, 1H), 8.27 (s, 1H), 8.50 (d, *J* = 2.3 Hz, 1H), 8.58 (s, 1H), 9.75 (s, 1H), 13.10 (s, 1H); <sup>13</sup>C NMR (151 MHz, DMSO-*d*<sub>6</sub>) δ 12.57, 16.79, 53.47, 112.06 – 112.67 (m), 114.25, 114.93, 117.45 – 118.21 (m), 119.01, 121.84 – 122.09 (m), 128.92 (d, *J* = 9.0 Hz), 131.09, 139.30, 145.28, 147.78, 152.28 (dd, *J* = 8.2, 249.8 Hz), 155.96 (dd, *J* = 6.7, 246.8 Hz), 180.62; <sup>19</sup>F NMR (565 MHz, DMSO-*d*<sub>6</sub>) δ –117.07, –122.33; LC-MS (ESI) *t*<sub>R</sub> = 11.02 min, 97% purity, *m/z* [M + H]<sup>+</sup> calcd for C<sub>17</sub>H<sub>15</sub><sup>81</sup>BrF<sub>2</sub>N<sub>3</sub>O<sub>3</sub>S, 460.00; found, 459.9.

***N*-[3-[5-(4-Chlorophenyl)-1*H*-pyrrolo[2,3-*b*]pyridine-3-carbonyl]-2,4-difluorophenyl]propane-1-sulfonamide (**4**, vemurafenib)<sup>3</sup>**

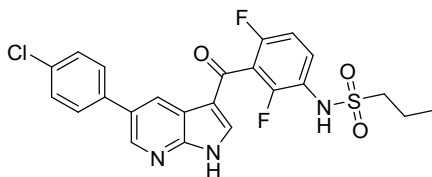

Compound **3** (458 mg, 1 mmol) and 4-(chlorophenyl)boronic acid (236 mg, 1.5 mmol) were suspended in MeCN (3 mL). After the addition of Na<sub>2</sub>CO<sub>3</sub> solution (2M, 2 mL), the mixture was flushed with argon and Pd(dppf)Cl<sub>2</sub> × CH<sub>2</sub>Cl<sub>2</sub> (82 mg, 0.1 mmol) was added. It was heated *via* microwave irradiation at 120 °C for 5 min. Subsequently, the mixture was poured onto H<sub>2</sub>O (100 mL) and it was extracted with EtOAc (3 × 50 mL). The organic layers were washed with brine (50 mL), dried over Na<sub>2</sub>SO<sub>4</sub>, filtered and evaporated. The crude product was purified by flash chromatography (gradient of 0 to 7% MeOH in CH<sub>2</sub>Cl<sub>2</sub>) to give vemurafenib (**4**) as a colourless solid.

Yield (197 mg, 40%); *R*<sub>f</sub> = 0.35 (petroleum ether/EtOAc 1:1); mp 256 – 258 °C; <sup>1</sup>H NMR (600 MHz, DMSO-*d*<sub>6</sub>) δ 0.97 (t, *J* = 7.4 Hz, 3H), 1.70 – 1.79 (m, 2H), 3.10 – 3.16 (m, 2H), 7.28 (td, *J* = 1.4, 8.8 Hz, 1H), 7.54 – 7.59 (m, 2H), 7.56 – 7.63 (m, 1H), 7.79 (d, *J* = 8.5 Hz, 2H), 8.24 (s, 1H), 8.64 (s, 1H), 8.71 (d, *J* = 2.2 Hz, 1H), 9.75 (s, 1H), 13.01 (s, 1H); <sup>13</sup>C NMR (151 MHz, DMSO-*d*<sub>6</sub>) δ 12.57, 16.80, 53.49, 112.32 (d, *J* = 22.1 Hz), 115.69, 117.47, 117.90 – 118.42 (m), 121.93 (d, *J* = 10.8 Hz), 127.06, 128.78 (d, *J* = 9.7 Hz), 128.91, 129.07, 130.25, 132.51, 137.01, 138.87, 143.93, 148.99, 152.33 (dd, *J* = 8.7, 249.7 Hz), 156.01 (dd, *J* = 6.7, 246.3 Hz), 180.63; <sup>19</sup>F NMR (565 MHz, DMSO-*d*<sub>6</sub>) δ –117.13, –122.38; LC-MS (ESI) *t*<sub>R</sub> = 11.68 min, 97% purity, *m/z* [M + H]<sup>+</sup> calcd for C<sub>23</sub>H<sub>19</sub>ClF<sub>2</sub>N<sub>3</sub>O<sub>3</sub>S, 490.08; found, 490.1.

***tert*-Butyl *N*-[4-[3-[2,6-difluoro-3-(propylsulfonylamino)benzoyl]-1*H*-pyrrolo[2,3-*b*]pyridin-5-yl]phenyl]carbamate (**5**)**

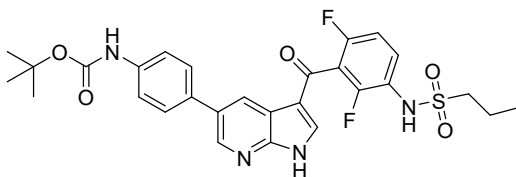

Compound **3** (458 mg, 1 mmol) and 4-(*N*-Boc-amino)phenylboronic acid (356 mg, 1.5 mmol) were suspended in dioxane (3 mL). After the addition of Na<sub>2</sub>CO<sub>3</sub> solution (2M, 2 mL), the mixture was flushed with argon, and Pd(dppf)Cl<sub>2</sub> × CH<sub>2</sub>Cl<sub>2</sub> (82 mg, 0.1 mmol) was added. It was heated *via* microwave

irradiation at 120 °C for 20 min. Subsequently, the mixture was poured onto H<sub>2</sub>O (100 mL) and extracted with EtOAc (3 × 50 mL). The organic layers were washed with brine (50 mL), dried over Na<sub>2</sub>SO<sub>4</sub>, filtered and evaporated. The crude product was purified by flash chromatography (gradient of petroleum ether/EtOAc 1:1 to 1:2) to yield the title compound as a colourless solid.

Yield (364 mg, 64%);  $R_f$  = 0.40 (petroleum ether/EtOAc 1:1); mp 226 – 228 °C; <sup>1</sup>H NMR (600 MHz, DMSO-*d*<sub>6</sub>) δ 0.96 (t, *J* = 7.4 Hz, 3H), 1.50 (s, 9H), 1.74 (q, *J* = 7.6 Hz, 2H), 3.09 – 3.15 (m, 2H), 7.28 (t, *J* = 8.6 Hz, 1H), 7.54 – 7.69 (m, 5H), 8.19 (s, 1H), 8.56 (s, 1H), 8.67 (d, *J* = 2.2 Hz, 1H), 9.47 (s, 1H), 9.75 (s, 1H), 12.93 (s, 1H); <sup>13</sup>C NMR (151 MHz, DMSO-*d*<sub>6</sub>) δ 12.58, 16.81, 28.12, 53.50, 79.16, 112.30 (d, *J* = 22.8 Hz), 115.62, 117.51, 118.23 (t, *J* = 23.3 Hz), 118.67, 121.97 (d, *J* = 11.8 Hz), 126.35, 127.31, 128.73 (d, *J* = 9.2 Hz), 131.29, 131.66, 138.53, 139.20, 143.73, 148.58, 152.33 (dd, *J* = 8.7, 249.7 Hz), 152.76, 155.99 (dd, *J* = 6.7, 246.3 Hz), 180.58; LC-MS (ESI)  $t_R$  = 11.56 min, 94% purity,  $m/z$  [M + H]<sup>+</sup> calcd for C<sub>28</sub>H<sub>29</sub>F<sub>2</sub>N<sub>4</sub>O<sub>5</sub>S, 571.18; found, 571.2; HRMS (ESI)  $m/z$  [M + H]<sup>+</sup> calcd for C<sub>28</sub>H<sub>29</sub>F<sub>2</sub>N<sub>4</sub>O<sub>5</sub>S, 571.1821; found, 571.1811.

***tert*-Butyl 4-[3-[2,6-difluoro-3-(propylsulfonylamino)benzoyl]-1*H*-pyrrolo[2,3-*b*]pyridin-5-yl]benzoate (6)**

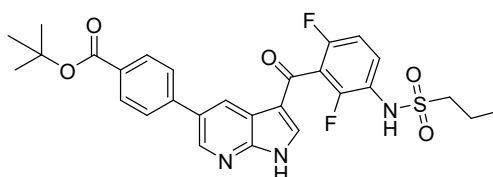

Compound **3** (1.15 g, 2.5 mmol), 4-(*tert*-butoxycarbonyl)phenylboronic acid (0.833 g, 3.75 mmol) and K<sub>2</sub>CO<sub>3</sub> (0.691 g, 5 mmol) were suspended in dry toluene (20 mL). After the mixture was flushed with Argon, Pd(dppf)Cl<sub>2</sub> × CH<sub>2</sub>Cl<sub>2</sub> (0.204 g, 0.25 mmol) was added. The reaction was stirred at 100 °C for 18 h, after which it was diluted with H<sub>2</sub>O (100 mL) and extracted with EtOAc (3 × 100 mL). The combined organic layers were washed with brine (50 mL), dried over Na<sub>2</sub>SO<sub>4</sub>, filtered and concentrated *in vacuo*. After purification of the crude product by column chromatography (gradient of petroleum ether/EtOAc 2:1 to 1:1), the pale yellow solid was washed several times with EtOAc to obtain the title compound as a colourless solid.

Yield (0.62 g, 44%);  $R_f$  = 0.43 (petroleum ether/EtOAc 1:1); mp 228 – 230 °C; <sup>1</sup>H NMR (600 MHz, DMSO-*d*<sub>6</sub>) δ 0.97 (t, *J* = 7.4 Hz, 3H), 1.58 (s, 9H), 1.70 – 1.79 (m, 2H), 3.10 – 3.16 (m, 2H), 7.25 – 7.32 (m, 1H), 7.59 (td, *J* = 5.8, 9.0 Hz, 1H), 7.87 – 7.92 (m, 2H), 8.01 – 8.05 (m, 2H), 8.26 (s, 1H), 8.69 (s, 1H), 8.77 (d, *J* = 2.2 Hz, 1H), 9.75 (s, 1H), 13.05 (s, 1H); <sup>13</sup>C NMR (151 MHz, DMSO-*d*<sub>6</sub>) δ 12.58, 16.80, 27.81, 53.50, 80.79, 112.34 (d, *J* = 23.2 Hz), 115.74, 117.50, 117.83 – 118.69 (m), 121.56 – 122.48 (m), 127.20, 127.25 (d, *J* =

21.9 Hz), 128.82 (d,  $J = 9.3$  Hz), 129.82, 130.28 (d,  $J = 10.9$  Hz), 138.98, 142.37, 144.15, 149.23, 152.34 (dd,  $J = 8.6$ , 249.7 Hz), 156.00 (dd,  $J = 7.0$ , 246.4 Hz), 164.76, 180.67; **LC-MS** (ESI)  $t_R = 12.20$  min, 98% purity,  $m/z$   $[M + H]^+$  calcd for  $C_{28}H_{28}F_2N_3O_5S$ , 556.17; found, 556.1; **HRMS** (ESI)  $m/z$   $[M + H]^+$  calcd for  $C_{28}H_{28}F_2N_3O_5S$ , 556.1712; found, 556.1712.

***N*-[2,4-Difluoro-3-[5-(4-formylphenyl)-1*H*-pyrrolo[2,3-*b*]pyridine-3-carbonyl]phenyl]propane-1-sulfonamide (7)**

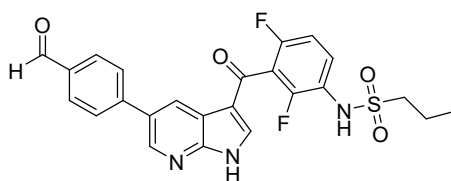

Compound **3** (1.15 g, 2.5 mmol), 4-(formylphenyl)boronic acid (0.562 g, 3.75 mmol) and  $K_2CO_3$  (0.691 g, 5 mmol) were suspended in DME/ $H_2O$  4:1 (20 mL). After the mixture was flushed with argon,  $Pd(dppf)Cl_2 \times CH_2Cl_2$  (0.204 g, 0.25 mmol) was added. The reaction was stirred at 85 °C for 18 h, after which it was diluted with  $H_2O$  (100 mL) and extracted with EtOAc (3  $\times$  100 mL). The combined organic layers were washed with brine (50 mL), dried over  $Na_2SO_4$ , filtered and concentrated *in vacuo*. After purification of the crude product by column chromatography (gradient of petroleum ether/EtOAc 2:1 to EtOAc), the pale yellow solid was washed several times with EtOAc to obtain the title product as a colourless solid.

Yield (0.81 g, 67%);  $R_f = 0.24$  (petroleum ether/EtOAc 1:2); mp 260 – 262 °C;  **$^1H$  NMR** (600 MHz,  $DMSO-d_6$ )  $\delta$  0.97 (t,  $J = 7.4$  Hz, 3H), 1.70 – 1.79 (m, 2H), 3.11 – 3.16 (m, 2H), 7.29 (td,  $J = 1.4$ , 8.8 Hz, 1H), 7.60 (td,  $J = 5.8$ , 9.0 Hz, 1H), 8.00 – 8.07 (m, 4H), 8.26 – 8.29 (m, 1H), 8.74 (s, 1H), 8.82 (d,  $J = 2.3$  Hz, 1H), 9.75 (s, 1H), 10.09 (s, 1H), 13.05 – 13.08 (m, 1H);  **$^{13}C$  NMR** (151 MHz,  $DMSO-d_6$ )  $\delta$  12.57, 16.80, 53.49, 112.34 (d,  $J = 22.6$  Hz), 115.78, 117.51, 118.09 (t,  $J = 23.3$  Hz), 121.95 (d,  $J = 13.5$  Hz), 127.54, 127.76, 128.83 (d,  $J = 9.9$  Hz), 130.16, 130.28, 135.10, 139.07, 143.95, 144.27, 149.33, 152.34 (dd,  $J = 8.6$ , 249.8 Hz), 156.02 (dd,  $J = 6.6$ , 246.5 Hz), 180.67, 192.73; **LC-MS** (ESI)  $t_R = 10.87$  min, 99% purity,  $m/z$   $[M + H]^+$  calcd for  $C_{24}H_{20}F_2N_3O_4S$ , 484.11; found, 484.3; **HRMS** (ESI)  $m/z$   $[M + H]^+$  calcd for  $C_{24}H_{20}F_2N_3O_4S$ , 484.1137; found, 484.1131.

***tert*-Butyl *N*-[[4-[3-[2,6-difluoro-3-(propylsulfonylamino)benzoyl]-1*H*-pyrrolo[2,3-*b*]pyridin-5-yl]phenyl]methyl]carbamate (8)<sup>12</sup>**

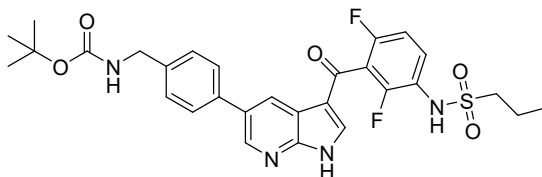

The reductive amination was performed as described previously.<sup>13</sup> In detail, to a mixture of compound **7** (725 mg, 1.5 mmol) and *tert*-butyl carbamate (0.53 g, 4.5 mmol) in CH<sub>2</sub>Cl<sub>2</sub>/MeCN 1:3 (25 mL) were added Et<sub>3</sub>SiH (0.72 mL, 4.5 mmol) and TFA (0.23 mL, 3 mmol) dropwise. After stirring at rt for 18 h, it was quenched with saturated NaHCO<sub>3</sub> solution (50 mL) and the aqueous layer was extracted with CH<sub>2</sub>Cl<sub>2</sub> (3 × 50 mL). The combined organic layers were washed with H<sub>2</sub>O (50 mL) and brine (50 mL). It was dried over Na<sub>2</sub>SO<sub>4</sub>, filtered and evaporated under reduced pressure. After purification by column chromatography (gradient of petroleum ether/EtOAc 1:1 to 1:2) and subsequent recrystallization from MeCN/EtOAc/MeOH 7:2:1 (10 mL), the title compound was obtained as a colourless solid.

Yield (0.30 g, 34%); *R*<sub>f</sub> = 0.20 (petroleum ether/EtOAc 1:2); mp 204 – 206 °C; <sup>1</sup>H NMR (600 MHz, DMSO-*d*<sub>6</sub>) δ 0.96 (t, *J* = 7.4 Hz, 3H), 1.41 (s, 9H), 1.70 – 1.79 (m, 2H), 3.10 – 3.16 (m, 2H), 4.20 (d, *J* = 6.2 Hz, 2H), 7.25 – 7.31 (m, 1H), 7.39 (d, *J* = 7.8 Hz, 2H), 7.44 (t, *J* = 6.3 Hz, 1H), 7.59 (td, *J* = 5.7, 9.0 Hz, 1H), 7.70 (d, *J* = 7.8 Hz, 2H), 8.22 (s, 1H), 8.61 (s, 1H), 8.70 (d, *J* = 2.4 Hz, 1H), 9.75 (s, 1H), 12.97 (s, 1H); <sup>13</sup>C NMR (151 MHz, DMSO-*d*<sub>6</sub>) δ 12.57, 16.80, 28.25, 43.08, 53.49, 77.80, 112.00 – 112.78 (m), 115.65, 117.50, 118.19 (t, *J* = 23.5 Hz), 121.93 (d, *J* = 15.7 Hz), 126.81, 126.99, 127.75, 128.75 (d, *J* = 9.8 Hz), 131.35, 136.50, 138.66, 139.61, 143.95, 148.80, 152.32 (dd, *J* = 8.6, 249.7 Hz), 155.82, 156.00 (dd, *J* = 7.3, 246.5 Hz), 180.59; LC-MS (ESI) *t*<sub>R</sub> = 11.10 min, 93% purity, *m/z* [M + H]<sup>+</sup> calcd for C<sub>29</sub>H<sub>31</sub>F<sub>2</sub>N<sub>4</sub>O<sub>5</sub>S, 585.20; found, 585.4.

**(2*S*,4*R*)-1-[(2*S*)-2-amino-3,3-dimethyl-butanoyl]-4-hydroxy-*N*-[[4-(4-methylthiazol-5-yl)phenyl]methyl]pyrrolidine-2-carboxamide (9)**

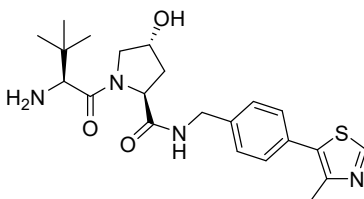

This compound was synthesized as we described previously.<sup>13</sup>

**(2*S*,4*R*)-4-Hydroxy-*N*-[[2-hydroxy-4-(4-methylthiazol-5-yl)phenyl]methyl]-1-[(2*S*)-3-methyl-2-(1-oxoisindolin-2-yl)butanoyl]pyrrolidine-2-carboxamide (10)**

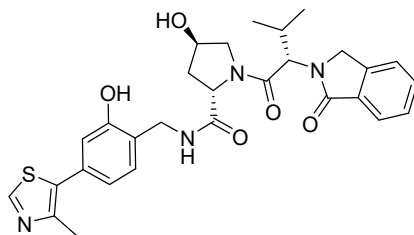

This compound was synthesized as we described previously.<sup>13</sup>

***tert*-Butyl 2-[2-[2-(benzyloxycarbonylamino)ethoxy]ethoxy]acetate (11a)**

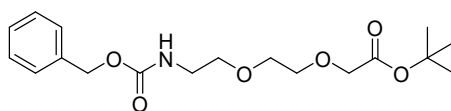

This compound was synthesized as we described previously.<sup>9</sup>

***tert*-Butyl 5-[2-[2-[2-(benzyloxycarbonylamino)ethoxy]ethoxy]ethoxy]pentanoate (11b)**

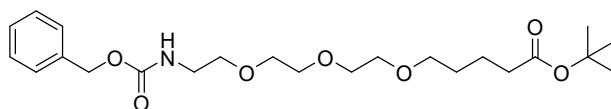

This compound was synthesized as we described previously.<sup>9</sup>

***tert*-Butyl 5-[5-[6-(benzyloxycarbonylamino)hexoxy]pentoxy]pentanoate (11c)**

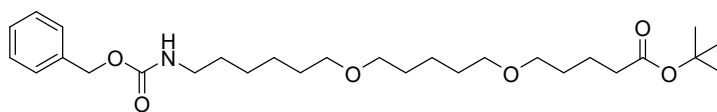

This compound was synthesized as we described previously.<sup>9</sup>

#### 4-(4-Chlorobutoxy)butan-1-ol (**29**)<sup>14</sup>

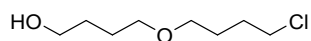

Butane-1,4-diol (3.0 mL, 50 mmol) was suspended in DMSO (10 mL) and aqueous NaOH (19.4 M, 2.5 mL). After stirring for 10 minutes, 1-bromo-4-chlorobutane (1.7 mL, 10 mmol) was added while cooling with a water bath. The resulting mixture was stirred at rt for 18 h, after which it was acidified to pH 2 with 2N HCl. The product was extracted with CH<sub>2</sub>Cl<sub>2</sub> (3 × 20 mL), washed with H<sub>2</sub>O (20 mL) and brine (20 mL), dried over Na<sub>2</sub>SO<sub>4</sub>, filtered and concentrated *in vacuo*. Column chromatography (gradient of petroleum ether/EtOAc 3:1 to 1:2) gave **29** as a colourless oil.

Yield (1.26 g, 70%);  $R_f$  = 0.54 (petroleum ether/EtOAc 1:2); <sup>1</sup>H NMR (500 MHz, DMSO-*d*<sub>6</sub>) δ 1.39 – 1.56 (m, 4H), 1.56 – 1.65 (m, 2H), 1.71 – 1.81 (m, 2H), 3.32 – 3.44 (m, 6H), 3.64 (t, *J* = 6.6 Hz, 2H), 4.33 (t, *J* = 5.1 Hz, 1H); <sup>13</sup>C NMR (126 MHz, DMSO-*d*<sub>6</sub>) δ 25.87, 26.58, 29.17, 29.25, 45.29, 60.53, 69.05, 69.90; LC-MS (ESI)  $t_R$  = 9.21 min,  $m/z$  [M + H]<sup>+</sup> calcd for C<sub>8</sub>H<sub>18</sub>ClO<sub>2</sub>, 181.10; found, 181.0.

#### *tert*-Butyl 5-[4-(4-chlorobutoxy)butoxy]pentanoate (**12a**)

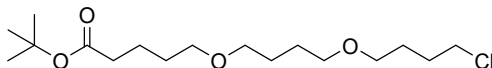

*tert*-Butyl bromopentanoate (0.90 g, 5 mmol) and **29** (1.19 g, 5 mmol) were dissolved in toluene (5 mL). While cooling, TBAHS (1.70 g, 5 mmol) and 50% aqueous NaOH solution (2.5 mL) were added. The reaction mixture was stirred at rt for 16 h. Subsequently it was diluted with H<sub>2</sub>O (30 mL) and extracted with EtOAc (3 × 30 mL). The combined organic layers were washed with H<sub>2</sub>O (30 mL) and brine (30 mL), dried over Na<sub>2</sub>SO<sub>4</sub>, filtered and concentrated *in vacuo*. Purification by column chromatography (gradient of petroleum ether/EtOAc 10:1 to 8:1) gave the title compound as a colourless oil.

Yield (175 mg, 10%);  $R_f$  = 0.40 (petroleum ether/EtOAc 8:1); <sup>1</sup>H NMR (600 MHz, CDCl<sub>3</sub>) δ 1.43 (s, 9H), 1.54 – 1.75 (m, 10H), 1.81 – 1.89 (m, 2H), 2.23 (t, *J* = 7.3 Hz, 2H), 3.37 – 3.48 (m, 8H), 3.56 (t, *J* = 6.7 Hz, 2H); <sup>13</sup>C NMR (151 MHz, CDCl<sub>3</sub>) δ 22.00, 26.62, 27.24, 28.25, 29.28, 29.70, 35.45, 45.14, 69.99, 70.54, 70.77, 70.82, 80.16, 173.17; LC-MS (ESI)  $t_R$  = 12.48 min,  $m/z$  [M + H]<sup>+</sup> calcd for C<sub>17</sub>H<sub>34</sub>ClO<sub>4</sub>, 337.21; found, 337.1; HRMS (ESI)  $m/z$  [M + H]<sup>+</sup> calcd for C<sub>17</sub>H<sub>34</sub>ClO<sub>4</sub>, 337.2140; found, 337.2132.

**2-[2-[2-[2-(*tert*-Butoxycarbonylamino)ethoxy]ethoxy]ethoxy]ethyl methanesulfonate (12b)**

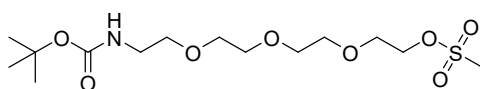

This compound was synthesized as we described previously.<sup>15</sup>

***tert*-Butyl 5-[2-[2-(2-chloroethoxy)ethoxy]ethoxy]pentanoate (12c)**

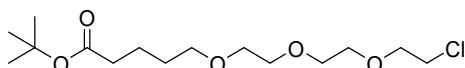

This compound was synthesized as we described previously.<sup>9</sup>

***tert*-Butyl 2-[2-[2-[[4-[3-[2,6-difluoro-3-(propylsulfonylamino)benzoyl]-1*H*-pyrrolo[2,3-*b*]pyridin-5-yl]benzoyl]amino]ethoxy]ethoxy]acetate (13a)**

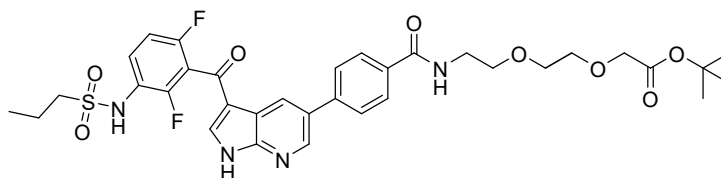

Linker **11a** (88 mg, 0.25 mmol) was dissolved in dry EtOAc (2.5 mL) and 10% Pd/C (10 mg) was added. The mixture was stirred under a hydrogen atmosphere at rt for 18 h. The suspension was filtered, and the filtrate was concentrated *in vacuo*. In a separate flask, vemurafenib derivative **6** (0.14 g, 0.25 mmol) was dissolved in dry CH<sub>2</sub>Cl<sub>2</sub>/TFA 4:1 (5 mL) and stirred at rt for 4 h. After removal of the volatiles under reduced pressure, it was co-evaporated with dry CH<sub>2</sub>Cl<sub>2</sub> (2 × 5 mL) and further dried under high vacuum. The deprotected acid was dissolved in dry DMF (2.5 mL) and treated with DIPEA (0.26 mL, 1.5 mmol) and HATU (0.10 g, 0.275 mmol). After stirring for 5 min at rt, the deprotected amine in dry DMF (2.5 mL) was added and the mixture was stirred at rt for 16 h. The mixture was diluted with H<sub>2</sub>O (50 mL) and extracted with EtOAc (3 × 25 mL). The combined organic layers were washed with brine (25 mL), dried over Na<sub>2</sub>SO<sub>4</sub>, filtered and concentrated *in vacuo*. Purification by column chromatography (gradient of CH<sub>2</sub>Cl<sub>2</sub>/MeOH 39:1 to 19:1) gave the title compound as a colourless solid.

Yield (86 mg, 49%); *R*<sub>f</sub> = 0.38 (CH<sub>2</sub>Cl<sub>2</sub>/MeOH 19:1); mp 94 – 96 °C; <sup>1</sup>H NMR (600 MHz, CDCl<sub>3</sub>) δ 0.96 (t, *J* = 7.4 Hz, 3H), 1.40 (s, 9H), 1.70 – 1.79 (m, 2H), 3.10 – 3.15 (m, 2H), 3.44 – 3.49 (m, 2H), 3.55 – 3.64 (m, 6H),

3.99 (s, 2H), 7.26 – 7.32 (m, 1H), 7.59 (td,  $J$  = 5.8, 9.0 Hz, 1H), 7.86 (d,  $J$  = 8.1 Hz, 2H), 7.98 – 8.03 (m, 2H), 8.26 (d,  $J$  = 3.1 Hz, 1H), 8.61 (t,  $J$  = 5.6 Hz, 1H), 8.69 (s, 1H), 8.77 (d,  $J$  = 2.2 Hz, 1H), 9.78 (s, 1H), 13.05 (s, 1H);  $^{13}\text{C}$  NMR (151 MHz,  $\text{CDCl}_3$ )  $\delta$  12.62, 16.84, 27.76, 53.46, 68.13, 68.90, 69.55, 69.87, 80.66, 112.39 (d,  $J$  = 23.0 Hz), 115.74, 117.53, 118.15 (t,  $J$  = 23.4 Hz), 121.95 (d,  $J$  = 11.8 Hz), 126.94, 127.24, 128.09, 128.84, 130.60, 133.32, 139.01, 140.72, 144.15, 149.13, 151.28 – 153.62 (m), 154.92 – 157.27 (m), 165.90, 169.39, 180.70; **LC-MS** (ESI)  $t_R$  = 11.07 min, 95% purity,  $m/z$   $[\text{M} + \text{H}]^+$  calcd for  $\text{C}_{34}\text{H}_{39}\text{F}_2\text{N}_4\text{O}_8\text{S}$ , 701.25; found, 701.5; **HRMS** (ESI)  $m/z$   $[\text{M} + \text{H}]^+$  calcd for  $\text{C}_{34}\text{H}_{39}\text{F}_2\text{N}_4\text{O}_8\text{S}$ , 701.2451; found, 701.2434.

**tert-Butyl 5-[2-[2-[2-[4-[3-[2,6-difluoro-3-(propylsulfonylamino)benzoyl]-1H-pyrrolo[2,3-b]pyridin-5-yl]benzoyl]amino]ethoxy]ethoxy]ethoxy]pentanoate (13b)**

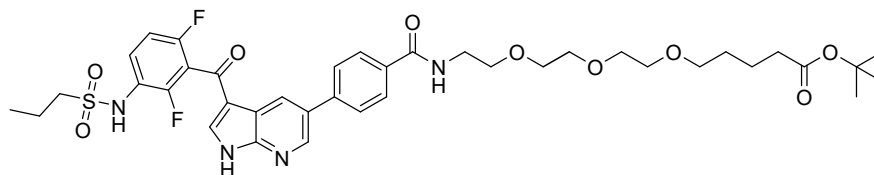

This compound was synthesized by analogy with **13a** but using linker **11b** (110 mg, 0.25 mmol). The crude product was purified by column chromatography silica gel (gradient from  $\text{CH}_2\text{Cl}_2/\text{MeOH}$  39:1 to 19:1) to yield the title compound as a colourless solid.

Yield (121 mg, 61%);  $R_f$  = 0.31 ( $\text{CH}_2\text{Cl}_2/\text{MeOH}$  15:1); mp 80 – 82 °C;  $^1\text{H}$  NMR (600 MHz,  $\text{DMSO}-d_6$ )  $\delta$  0.97 (t,  $J$  = 7.5 Hz, 3H), 1.36 (s, 9H), 1.42 – 1.53 (m, 4H), 1.70 – 1.79 (m, 2H), 2.16 (t,  $J$  = 7.0 Hz, 2H), 3.10 – 3.16 (m, 2H), 3.35 (t,  $J$  = 6.1 Hz, 2H), 3.42 – 3.49 (m, 4H), 3.49 – 3.60 (m, 8H), 7.25 – 7.32 (m, 1H), 7.54 – 7.63 (m, 1H), 7.84 – 7.89 (m, 2H), 7.98 – 8.03 (m, 2H), 8.25 (s, 1H), 8.58 (t,  $J$  = 5.6 Hz, 1H), 8.69 (s, 1H), 8.77 (d,  $J$  = 2.3 Hz, 1H), 9.74 (s, 1H), 13.02 (s, 1H);  $^{13}\text{C}$  NMR (151 MHz,  $\text{DMSO}-d_6$ )  $\delta$  12.57, 16.80, 21.41, 27.71, 28.43, 34.44, 53.49, 68.89, 69.42, 69.64, 69.75, 69.77, 69.83, 78.90 – 79.80 (m), 112.31 (dd,  $J$  = 3.5, 22.9 Hz), 115.72, 117.49, 117.87 – 118.82 (m), 121.95 (d,  $J$  = 13.4 Hz), 126.87, 127.19, 128.03, 128.78, 130.56, 133.30, 138.87, 140.68, 144.10, 149.10, 152.33 (dd,  $J$  = 8.7, 249.7 Hz), 156.00 (dd,  $J$  = 6.6, 246.5 Hz), 165.83, 172.17, 180.63; **LC-MS** (ESI)  $t_R$  = 11.61 min, 96% purity,  $m/z$   $[\text{M} + \text{H}]^+$  calcd for  $\text{C}_{39}\text{H}_{49}\text{F}_2\text{N}_4\text{O}_9\text{S}$ , 787.32; found, 787.5; **HRMS** (ESI)  $m/z$   $[\text{M} + \text{H}]^+$  calcd for  $\text{C}_{39}\text{H}_{49}\text{F}_2\text{N}_4\text{O}_9\text{S}$ , 787.3183; found, 787.3161.

**tert-Butyl 5-[5-[6-[[4-[3-[2,6-difluoro-3-(propylsulfonylamino)benzoyl]-1H-pyrrolo[2,3-b]pyridin-5-yl]benzoyl]amino]hexoxy]pentoxy]pentanoate (13c)**

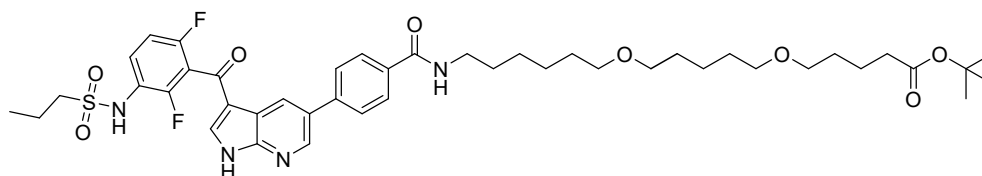

This compound was synthesized by analogy with **13a** but using linker **11c** (123 mg, 0.25 mmol). The crude product was purified by column chromatography silica gel (CH<sub>2</sub>Cl<sub>2</sub>/MeOH 39:1) to yield the title compound as a colourless solid.

Yield (95 mg, 45%); *R<sub>f</sub>* = 0.35 (CH<sub>2</sub>Cl<sub>2</sub>/MeOH 19:1); mp 88 – 90 °C; <sup>1</sup>H NMR (600 MHz, DMSO-*d*<sub>6</sub>) δ 0.97 (t, *J* = 7.5 Hz, 3H), 1.26 – 1.36 (m, 6H), 1.37 (s, 9H), 1.43 – 1.57 (m, 12H), 1.70 – 1.79 (m, 2H), 2.17 (t, *J* = 7.0 Hz, 2H), 3.13 (dd, *J* = 6.4, 8.9 Hz, 2H), 3.25 – 3.36 (m, 10H), 7.28 (t, *J* = 8.7 Hz, 1H), 7.56 – 7.63 (m, 1H), 7.85 (d, *J* = 8.0 Hz, 2H), 7.99 (d, *J* = 8.0 Hz, 2H), 8.25 (s, 1H), 8.51 (t, *J* = 5.6 Hz, 1H), 8.69 (s, 1H), 8.77 (d, *J* = 2.2 Hz, 1H), 9.75 (s, 1H), 13.02 (s, 1H); <sup>13</sup>C NMR (151 MHz, DMSO-*d*<sub>6</sub>) δ 12.57, 16.80, 21.51, 22.49, 25.49, 26.33, 27.72, 28.48, 29.01, 29.02, 29.08, 29.18, 34.49, 53.50, 69.46, 69.82, 69.88, 79.30, 112.31 (d, *J* = 22.3 Hz), 115.72, 117.50, 117.92 – 118.62 (m), 121.96 (d, *J* = 13.5 Hz), 126.85, 127.17, 127.99, 128.79 (d, *J* = 9.6 Hz), 130.61, 133.61, 138.87, 140.55, 144.10, 149.10, 152.34 (dd, *J* = 8.4, 249.5 Hz), 156.01 (dd, *J* = 7.0, 246.7 Hz), 165.63, 172.18, 180.64; LC-MS (ESI) *t<sub>R</sub>* = 12.21 min, 92% purity, *m/z* [M + H]<sup>+</sup> calcd for C<sub>44</sub>H<sub>59</sub>F<sub>2</sub>N<sub>4</sub>O<sub>8</sub>S, 841.40; found, 841.5; HRMS (ESI) *m/z* [M + H]<sup>+</sup> calcd for C<sub>44</sub>H<sub>59</sub>F<sub>2</sub>N<sub>4</sub>O<sub>8</sub>S, 841.4016; found, 841.3998.

**tert-Butyl 5-[4-[4-[2-[[[(2S,4R)-4-hydroxy-1-[(2S)-3-methyl-2-(1-oxoisindolin-2-yl)butanoyl]-pyrrolidine-2-carbonyl]amino]methyl]-5-(4-methylthiazol-5-yl)phenoxy]butoxy]butoxy]pentanoate (14a)**

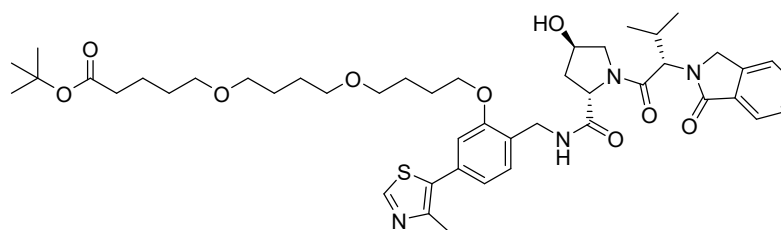

VHL ligand **10** (274 mg, 0.5 mmol) and linker **12a** (202 mg, 0.6 mmol) were dissolved in DMF (10 mL). K<sub>2</sub>CO<sub>3</sub> (173 mg, 1.25 mmol) was added, and the mixture was heated to 70 °C for 18 h. It was quenched

with half-saturated brine (20 mL) and extracted with EtOAc (3 × 20 mL). The combined organic layers were washed with 5% LiCl solution and brine (20 mL each), dried over Na<sub>2</sub>SO<sub>4</sub>, filtrated and concentrated *in vacuo*. Purification by column chromatography (CH<sub>2</sub>Cl<sub>2</sub>/MeOH 19:1) yielded the title compound as a yellow oil.

Yield (164 mg, 39%); *R<sub>f</sub>* = 0.31 (CH<sub>2</sub>Cl<sub>2</sub>/MeOH 19:1); <sup>1</sup>H NMR (600 MHz, DMSO-*d*<sub>6</sub>) δ 0.74 (d, *J* = 6.7 Hz, 3H), 0.96 (d, *J* = 6.5 Hz, 3H), 1.38 (s, 9H), 1.44 – 1.53 (m, 8H), 1.65 – 1.72 (m, 2H), 1.75 – 1.84 (m, 2H), 1.93 (ddd, *J* = 4.8, 8.0, 12.7 Hz, 1H), 2.00 – 2.07 (m, 1H), 2.18 (t, *J* = 7.1 Hz, 2H), 2.28 – 2.36 (m, 1H), 2.47 (s, 3H), 3.27 – 3.47 (m, 8H), 3.66 – 3.71 (m, 1H), 3.78 (dd, *J* = 4.5, 10.6 Hz, 1H), 4.07 (t, *J* = 6.3 Hz, 2H), 4.23 (dd, *J* = 5.9, 16.2 Hz, 1H), 4.27 – 4.59 (m, 5H), 4.71 (d, *J* = 10.8 Hz, 1H), 5.07 (d, *J* = 4.2 Hz, 1H), 6.97 – 7.02 (m, 2H), 7.34 (d, *J* = 7.6 Hz, 1H), 7.46 – 7.53 (m, 1H), 7.57 – 7.63 (m, 1H), 7.62 (s, 1H), 7.71 (d, *J* = 7.5 Hz, 1H), 8.34 (t, *J* = 6.0 Hz, 1H), 8.98 (s, 1H); <sup>13</sup>C NMR (151 MHz, DMSO-*d*<sub>6</sub>) δ 15.96, 18.58, 18.85, 21.51, 25.68, 25.86, 26.05, 26.08, 27.73, 28.35, 28.47, 34.48, 37.00, 38.04, 46.78, 55.36, 57.76, 58.66, 67.56, 68.58, 69.44, 69.60, 69.68, 69.74, 79.31, 111.68, 120.74, 122.98, 123.57, 126.96, 127.70, 127.86, 130.95, 131.27, 131.36, 131.54, 142.17, 147.85, 151.38, 155.89, 167.44, 168.08, 171.48, 172.18; LC-MS (ESI) *t<sub>R</sub>* = 12.21 min, 96% purity, *m/z* [M + H]<sup>+</sup> calcd for C<sub>46</sub>H<sub>65</sub>N<sub>4</sub>O<sub>9</sub>S, 849.45; found, 849.5; HRMS (ESI) *m/z* [M + H]<sup>+</sup> calcd for C<sub>46</sub>H<sub>65</sub>N<sub>4</sub>O<sub>9</sub>S, 849.4467; found, 849.4450.

***tert*-Butyl *N*-[2-[2-[2-[2-[2-[[[(2*S*,4*R*)-4-hydroxy-1-[(2*S*)-3-methyl-2-(1-oxoisindolin-2-yl)butanoyl]pyrrolidine-2-carbonyl]amino]methyl]-5-(4-methylthiazol-5-yl)phenoxy]ethoxy]ethoxy]ethoxy]ethyl]carbamate (14b)**

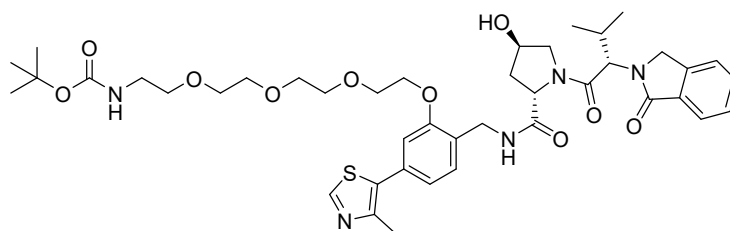

This compound was synthesized by analogy with **14a** but using linker **12b** (223 mg, 0.25 mmol). The crude product was purified by column chromatography silica gel (CH<sub>2</sub>Cl<sub>2</sub>/MeOH 19:1) to yield the title compound as a colourless solid.

Yield (360 mg, 87%); *R<sub>f</sub>* = 0.31 (CH<sub>2</sub>Cl<sub>2</sub>/MeOH 15:1); mp 62 – 64 °C; <sup>1</sup>H NMR (600 MHz, DMSO-*d*<sub>6</sub>) δ 0.74 (d, *J* = 6.6 Hz, 3H), 0.97 (d, *J* = 6.5 Hz, 3H), 1.36 (s, 9H), 1.89 – 1.96 (m, 1H), 2.01 – 2.08 (m, 1H), 2.28 – 2.38 (m, 1H), 2.47 (s, 3H), 3.05 (q, *J* = 6.0 Hz, 2H), 3.36 (t, *J* = 6.1 Hz, 2H), 3.47 (dd, *J* = 3.6, 6.1 Hz, 2H), 3.51 (dd,

$J = 3.6, 6.0$  Hz, 2H), 3.55 (dd,  $J = 3.7, 5.9$  Hz, 2H), 3.63 (dd,  $J = 3.7, 5.8$  Hz, 2H), 3.66 – 3.72 (m, 1H), 3.74 – 3.84 (m, 3H), 4.19 (dd,  $J = 3.7, 5.7$  Hz, 2H), 4.21 – 4.60 (m, 6H), 4.72 (d,  $J = 10.8$  Hz, 1H), 5.07 (d,  $J = 4.1$  Hz, 1H), 6.71 (t,  $J = 5.8$  Hz, 1H), 7.01 (dd,  $J = 1.6, 7.8$  Hz, 1H), 7.05 (d,  $J = 1.6$  Hz, 1H), 7.34 (d,  $J = 7.8$  Hz, 1H), 7.50 (ddd,  $J = 2.2, 6.1, 8.0$  Hz, 1H), 7.57 – 7.65 (m, 2H), 7.71 (d,  $J = 7.6$  Hz, 1H), 8.34 (t,  $J = 5.9$  Hz, 1H), 8.98 (s, 1H);  $^{13}\text{C}$  NMR (151 MHz, DMSO- $d_6$ )  $\delta$  15.98, 18.59, 18.85, 28.19, 28.35, 37.03, 38.06, 40.06, 46.78, 55.37, 57.76, 58.68, 67.90, 68.59, 68.98, 69.13, 69.48, 69.74, 69.82, 70.05, 77.53, 112.18, 121.06, 122.98, 123.58, 127.18, 127.69, 127.87, 130.96, 131.22, 131.36, 131.54, 142.17, 147.91, 151.41, 155.55, 155.86, 167.45, 168.08, 171.51; LC-MS (ESI)  $t_R = 11.12$  min, 98% purity,  $m/z$   $[\text{M} + \text{H}]^+$  calcd for  $\text{C}_{42}\text{H}_{58}\text{N}_5\text{O}_{10}\text{S}$ , 824.39; found, 824.6; HRMS (ESI)  $m/z$   $[\text{M} + \text{H}]^+$  calcd for  $\text{C}_{42}\text{H}_{58}\text{N}_5\text{O}_{10}\text{S}$ , 824.3899; found, 824.3878.

**tert-Butyl 5-[2-[2-[2-[2-[[[(2S,4R)-4-hydroxy-1-[(2S)-3-methyl-2-(1-oxoisindolin-2-yl)butanoyl]pyrrolidine-2-carbonyl]amino]methyl]-5-(4-methylthiazol-5-yl)phenoxy]ethoxy]ethoxy]ethoxy]pentanoate (14c)**

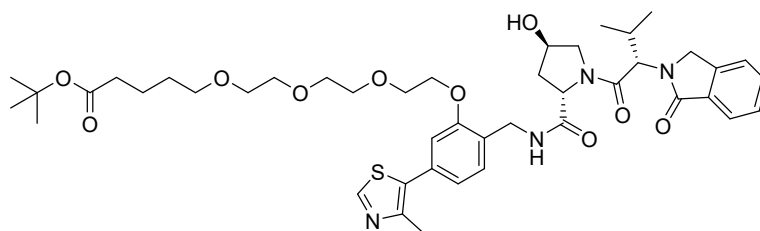

This compound was synthesized by analogy with **14a** but using linker **12c** (195 mg, 0.25 mmol). The crude product was purified by column chromatography silica gel ( $\text{CH}_2\text{Cl}_2/\text{MeOH}$  29:1) to yield the title compound as a yellow oil.

Yield (106 mg, 25%);  $R_f = 0.43$  ( $\text{CH}_2\text{Cl}_2/\text{MeOH}$  15:1);  $^1\text{H}$  NMR (600 MHz, DMSO- $d_6$ )  $\delta$  0.74 (d,  $J = 6.7$  Hz, 3H), 0.97 (d,  $J = 6.4$  Hz, 3H), 1.37 (s, 9H), 1.43 – 1.52 (m, 4H), 1.92 (ddd,  $J = 4.7, 8.0, 12.7$  Hz, 1H), 2.04 (ddd,  $J = 2.5, 7.6, 11.8$  Hz, 1H), 2.17 (t,  $J = 7.0$  Hz, 2H), 2.32 (dq,  $J = 6.5, 10.8$  Hz, 1H), 2.47 (s, 3H), 3.35 (t,  $J = 6.0$  Hz, 2H), 3.44 (dd,  $J = 3.8, 6.0$  Hz, 2H), 3.51 (dd,  $J = 3.9, 5.8$  Hz, 2H), 3.55 (dd,  $J = 3.7, 5.9$  Hz, 2H), 3.63 (dd,  $J = 3.8, 5.9$  Hz, 2H), 3.66 – 3.71 (m, 1H), 3.75 – 3.82 (m, 3H), 4.17 – 4.21 (m, 2H), 4.22 – 4.31 (m, 2H), 4.33 (td,  $J = 3.6, 6.1$  Hz, 1H), 4.41 (t,  $J = 7.9$  Hz, 1H), 4.46 (d,  $J = 18.0$  Hz, 1H), 4.55 (d,  $J = 18.1$  Hz, 1H), 4.71 (d,  $J = 10.8$  Hz, 1H), 7.01 (dd,  $J = 1.6, 7.7$  Hz, 1H), 7.05 (d,  $J = 1.7$  Hz, 1H), 7.34 (d,  $J = 7.8$  Hz, 1H), 7.50 (ddd,  $J = 2.3, 6.0, 7.9$  Hz), 7.65 – 7.57 (m, 2H), 7.71 (d,  $J = 7.6$  Hz, 1H), 8.33 (t,  $J = 6.0$  Hz, 1H), 8.99 (s, 1H). The signal for OH is missing.  $^{13}\text{C}$  NMR (151 MHz, DMSO- $d_6$ )  $\delta$  15.97, 18.59, 18.85, 21.43, 27.73, 28.35, 28.44, 34.46, 37.03, 38.05, 46.78, 55.37, 57.76, 58.68, 67.90, 68.59, 68.98, 69.41, 69.78, 69.82, 69.85, 70.06, 79.33, 112.17, 121.05, 122.98, 123.58, 127.20, 127.70, 127.87, 130.95, 131.23, 131.36, 131.54, 142.17, 147.88,

151.42, 155.86, 167.45, 168.07, 171.50, 172.19; **LC-MS** (ESI)  $t_R$  = 11.64 min, 96% purity,  $m/z$   $[M + H]^+$  calcd for  $C_{44}H_{61}N_4O_{10}S$ , 837.41; found, 837.9; **HRMS** (ESI)  $m/z$   $[M + H]^+$  calcd for  $C_{44}H_{61}N_4O_{10}S$ , 837.4103; found, 837.4081.

#### BRAF-targeting PROTAC **15a**

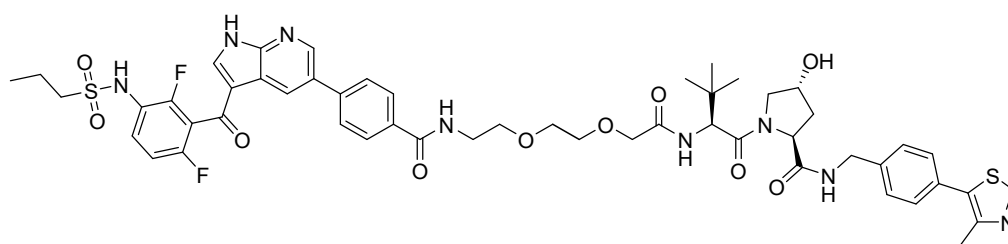

Conjugate **13a** (70 mg, 0.1 mmol) and VHL ligand **9** (53 mg, 0.1 mmol) were treated in separate flasks with TFA/dry  $CH_2Cl_2$  4:1 (5 mL) at rt for 4 h. After removal of the volatiles, the residue was co-evaporated with dry  $CH_2Cl_2$  (2  $\times$  5 mL), and the material was dried under high vacuum. After reconstitution with dry DMF (each 5 mL) and addition of DIPEA (each 39 mg, 52  $\mu$ L, 0.3 mmol), HATU (42 mg, 0.11 mmol) was added to the first flask containing the free acid derived from **13a**. After stirring for 5 min at rt, both solutions were combined, and it was stirred at rt for 18 h. Subsequently, it was diluted with  $H_2O$  (50 mL), extracted with EtOAc (3  $\times$  25 mL), and the combined organic layers were washed with 5% LiCl solution and brine (each 50 mL). The solution was dried over  $Na_2SO_4$ , filtered, and concentrated *in vacuo*. The crude product was purified by column chromatography silica gel (gradient from  $CH_2Cl_2$ /MeOH 19:1 to 9:1) to yield the title compound as a colourless solid.

Yield (35 mg, 33%);  $R_f$  = 0.14 ( $CH_2Cl_2$ /MeOH 15:1); mp 176 – 178  $^{\circ}C$ ;  **$^1H$  NMR** (600 MHz,  $DMSO-d_6$ )  $\delta$  0.91 – 0.98 (m, 12H), 1.70 – 1.78 (m, 2H), 1.81 – 2.00 (m, 2H), 2.04 – 2.10 (m, 1H), 2.43 (s, 3H), 3.10 – 3.15 (m, 2H), 3.48 (q,  $J$  = 5.8 Hz, 2H), 3.57 – 3.71 (m, 8H), 3.98 (s, 1H), 4.25 (dd,  $J$  = 5.8, 15.7 Hz, 1H), 4.37 (dd,  $J$  = 6.2, 15.7 Hz, 2H), 4.47 (t,  $J$  = 8.1 Hz, 1H), 4.58 (d,  $J$  = 9.5 Hz, 1H), 5.18 (d,  $J$  = 3.6 Hz, 1H), 7.28 (t,  $J$  = 8.9 Hz, 1H), 7.36 – 7.47 (m, 5H), 7.55 – 7.63 (m, 1H), 7.82 – 7.87 (m, 2H), 7.99 (d,  $J$  = 8.4 Hz, 2H), 8.23 (s, 1H), 8.54 – 8.65 (m, 2H), 8.68 (s, 1H), 8.76 (d,  $J$  = 2.3 Hz, 1H), 8.95 (s, 1H), 9.74 (s, 1H), 13.07 (s, 1H);  **$^{13}C$  NMR** (151 MHz,  $DMSO-d_6$ )  $\delta$  12.59, 15.89, 16.81, 26.19, 35.72, 37.92, 41.68, 53.50, 55.73, 56.57, 58.73, 68.84, 69.04, 69.38, 69.57, 70.41, 112.30 (d,  $J$  = 23.2 Hz), 115.71, 117.51, 118.13 (t,  $J$  = 23.5 Hz), 121.83 – 122.26 (m), 126.89, 127.20, 127.45, 128.07, 128.80, 129.70, 130.58, 131.11, 133.27, 138.90, 139.39, 140.68, 144.11, 147.72, 149.09, 151.38, 153.20 (d,  $J$  = 8.9 Hz), 155.95 (d,  $J$  = 246.4 Hz), 165.92, 168.63, 169.20,

171.69, 180.67; **LC-MS** (ESI)  $t_R$  = 11.16 min, 96% purity,  $m/z$   $[M + H]^+$  calcd for  $C_{52}H_{59}F_2N_8O_{10}S_2$ , 1057.38; found, 1057.6; **HRMS** (ESI)  $m/z$   $[M + H]^+$  calcd for  $C_{52}H_{59}F_2N_8O_{10}S_2$ , 1057.3758; found, 1057.3760.

#### BRAF-targeting PROTAC 15b

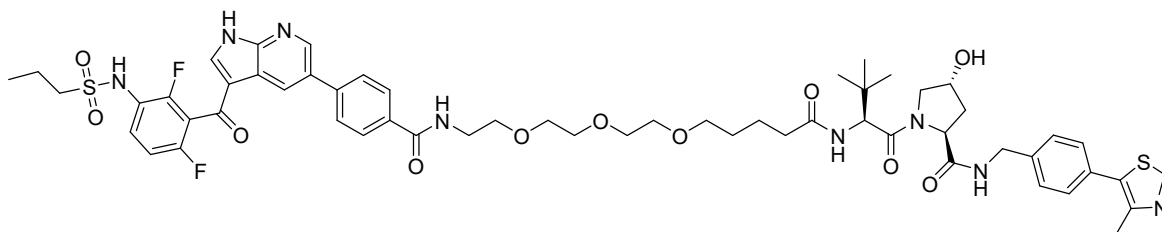

This compound was synthesized by analogy with **15a** but using conjugate **13b** (79 mg, 0.1 mmol). The crude product was purified by column chromatography silica gel (gradient from  $CH_2Cl_2$ /MeOH 19:1 to 9:1), followed by preparative HPLC ( $H_2O$ /MeOH 25/75) to yield the title compound as a colourless solid.

Yield (69 mg, 61%);  $R_f$  = 0.14 ( $CH_2Cl_2$ /MeOH 15:1); mp 144 – 146 °C;  $^1H$  NMR (600 MHz,  $DMSO-d_6$ )  $\delta$  0.93 (s, 9H), 0.96 (t,  $J$  = 7.4 Hz, 3H), 1.42 – 1.55 (m, 4H), 1.71 – 1.78 (m, 2H), 1.87 – 1.93 (m, 1H), 2.00 – 2.05 (m, 1H), 2.10 – 2.16 (m, 1H), 2.22 – 2.30 (m, 1H), 2.44 (s, 3H), 3.10 – 3.14 (m, 2H), 3.36 (t,  $J$  = 6.1 Hz, 2H), 3.43 – 3.47 (m, 4H), 3.50 – 3.57 (m, 8H), 3.61 – 3.69 (m, 2H), 4.21 (dd,  $J$  = 5.5, 15.8 Hz, 1H), 4.32 – 4.37 (m, 1H), 4.39 – 4.46 (m, 2H), 4.54 (d,  $J$  = 9.2 Hz, 1H), 5.10 (d,  $J$  = 3.6 Hz, 1H), 7.25 – 7.30 (m, 1H), 7.36 – 7.43 (m, 4H), 7.55 – 7.62 (m, 1H), 7.84 (dd,  $J$  = 8.8, 25.7 Hz, 3H), 7.97 – 8.02 (m, 2H), 8.24 (s, 1H), 8.53 (t,  $J$  = 6.1 Hz, 1H), 8.59 (t,  $J$  = 5.6 Hz, 1H), 8.69 (s, 1H), 8.77 (d,  $J$  = 2.2 Hz, 1H), 8.97 (s, 1H), 9.75 (s, 1H), 13.01 (s, 1H);  $^{13}C$  NMR (151 MHz,  $DMSO-d_6$ )  $\delta$  12.58, 15.90, 16.81, 22.18, 26.34, 28.74, 34.58, 35.16, 37.91, 41.63, 53.48, 56.28, 56.31, 58.66, 68.84, 68.89, 69.43, 69.62, 69.73, 69.76, 70.00, 112.29 (d,  $J$  = 21.8 Hz), 115.72, 117.49, 117.90 – 118.34 (m), 121.97 – 122.18 (m), 126.88, 127.18, 128.60 – 128.80 (m), 127.40, 128.04, 128.60, 128.45 – 129.12 (m), 129.61, 130.55, 131.13, 133.29, 138.88, 139.47, 140.68, 144.10, 147.69, 149.10, 151.38, 151.44 – 153.36 (m), 154.44 – 158.22 (m), 165.86, 169.69, 171.90, 171.95, 180.66; **LC-MS** (ESI)  $t_R$  = 11.08 min, 99% purity,  $m/z$   $[M + H]^+$  calcd for  $C_{57}H_{69}F_2N_8O_{11}S_2$ , 1143.45; found, 1144.0; **HRMS** (ESI)  $m/z$   $[M + H]^+$  calcd for  $C_{57}H_{69}F_2N_8O_{11}S_2$ , 1143.4490; found, 1143.4495.

## BRAF-targeting PROTAC 15c

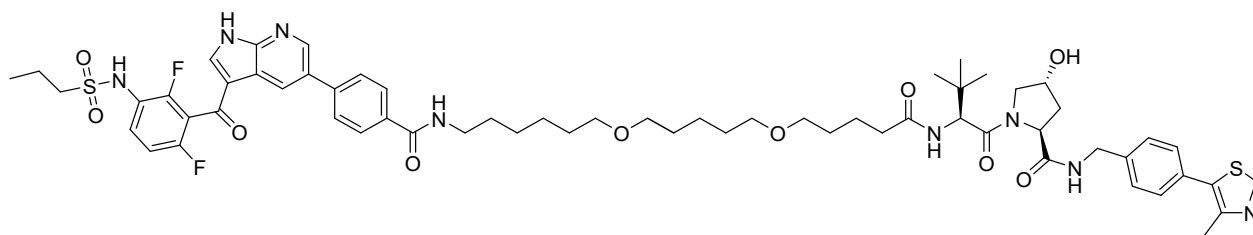

This compound was synthesized by analogy with **15a** but using conjugate **13c** (84 mg, 0.1 mmol). The crude product was purified by column chromatography silica gel (gradient from CH<sub>2</sub>Cl<sub>2</sub>/MeOH 19:1 to 9:1), followed by preparative HPLC (H<sub>2</sub>O/MeOH 20/80) to yield the title compound as a colourless solid.

Yield (26 mg, 22%);  $R_f$  = 0.22 (CH<sub>2</sub>Cl<sub>2</sub>/MeOH 15:1); mp 110 – 112 °C; <sup>1</sup>H NMR (600 MHz, DMSO-*d*<sub>6</sub>) δ 0.93 (s, 9H), 0.96 (t,  $J$  = 7.4 Hz, 3H), 1.27 – 1.35 (m, 6H), 1.43 – 1.56 (m, 12H), 1.70 – 1.79 (m, 2H), 1.86 – 1.94 (m, 1H), 1.99 – 2.06 (m, 1H), 2.07 – 2.16 (m, 1H), 2.22 – 2.30 (m, 1H), 2.44 (s, 3H), 3.11 – 3.15 (m, 2H), 3.26 – 3.31 (m, 8H), 3.34 (d,  $J$  = 6.7 Hz, 2H), 3.61 – 3.70 (m, 2H), 4.21 (dd,  $J$  = 5.5, 15.8 Hz, 1H), 4.32 – 4.37 (m, 1H), 4.39 – 4.46 (m, 2H), 4.54 (d,  $J$  = 9.4 Hz, 1H), 5.10 (d,  $J$  = 3.6 Hz, 1H), 7.28 (t,  $J$  = 8.8 Hz, 1H), 7.35 – 7.44 (m, 4H), 7.55 – 7.63 (m, 1H), 7.83 (dd,  $J$  = 8.6, 19.6 Hz, 3H), 7.96 – 8.01 (m, 2H), 8.25 (s, 1H), 8.48 – 8.56 (m, 2H), 8.68 (s, 1H), 8.77 (d,  $J$  = 2.2 Hz, 1H), 8.97 (s, 1H), 9.75 (s, 1H), 13.02 (s, 1H); <sup>13</sup>C NMR (151 MHz, DMSO-*d*<sub>6</sub>) δ 12.57, 15.90, 16.79, 22.24, 22.48, 25.48, 26.34, 28.79, 29.03, 29.08, 29.18, 34.60, 35.17, 37.91, 41.63, 53.48, 56.27, 56.30, 58.66, 68.83, 69.61, 69.85, 69.88, 112.32 (d,  $J$  = 21.6 Hz), 115.71, 117.48, 117.81 – 118.50 (m), 121.71 – 122.19 (m), 126.85, 127.16, 127.40, 127.98, 128.60, 128.66 – 129.03 (m), 129.61, 130.60, 131.13, 133.59, 138.87, 139.47, 140.53, 144.10, 147.69, 149.08, 151.38, 151.43 – 153.32 (m), 154.98 – 157.13 (m), 165.62, 169.68, 171.90, 171.95, 180.63; LC-MS (ESI)  $t_R$  = 11.91 min, 99% purity,  $m/z$  [M + H]<sup>+</sup> calcd for C<sub>62</sub>H<sub>79</sub>F<sub>2</sub>N<sub>8</sub>O<sub>10</sub>S<sub>2</sub>, 1197.53; found, 1198.2; HRMS (ESI)  $m/z$  [M + H]<sup>+</sup> calcd for C<sub>62</sub>H<sub>79</sub>F<sub>2</sub>N<sub>8</sub>O<sub>10</sub>S<sub>2</sub>, 1197.5323; found, 1197.5326.

## BRAF-targeting PROTAC 16a

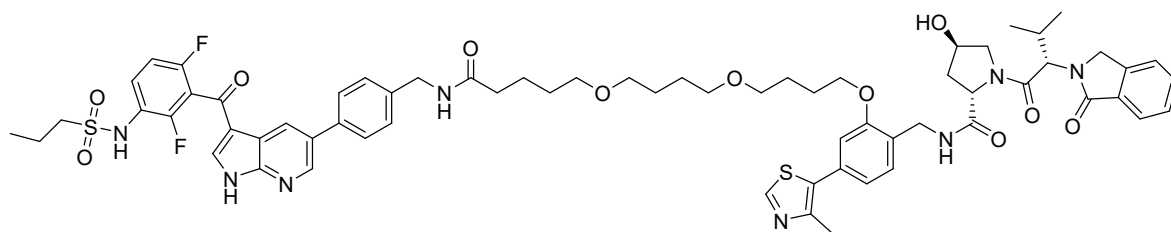

Conjugate **14a** (85 mg, 0.1 mmol) and BRAF ligand **8** (58 mg, 0.1 mmol) were treated in separate flasks with TFA/dry CH<sub>2</sub>Cl<sub>2</sub> 4:1 (5 mL) at rt for 4 h. After removal of the volatiles, the residue was co-evaporated with dry CH<sub>2</sub>Cl<sub>2</sub> (2 × 5 mL), and the material was dried under high vacuum. After reconstitution with dry DMF (each 5 mL) and addition of DIPEA (each 39 mg, 52  $\mu$ L, 0.3 mmol), HATU (42 mg, 0.11 mmol) was added to the first flask containing the free acid derived from **14a**. After stirring for 5 min at rt, both solutions were combined, and it was stirred at rt for 18 h. Subsequently, it was diluted with H<sub>2</sub>O (50 mL), extracted with EtOAc (3 × 25 mL), and the combined organic layers were washed with 5% LiCl solution and brine (each 50 mL). The solution was dried over Na<sub>2</sub>SO<sub>4</sub>, filtered, and concentrated *in vacuo*. The crude product was purified by column chromatography silica gel (gradient from CH<sub>2</sub>Cl<sub>2</sub>/MeOH 19:1 to 9:1) followed by preparative HPLC (H<sub>2</sub>O/MeOH 20/80) to yield the title compound as a colourless solid.

Yield (83 mg, 66%);  $R_f$  = 0.21 (CH<sub>2</sub>Cl<sub>2</sub>/MeOH 15:1); mp 134 – 136 °C; <sup>1</sup>H NMR (600 MHz, DMSO-*d*<sub>6</sub>)  $\delta$  0.73 (d,  $J$  = 6.6 Hz, 3H), 0.93 – 0.99 (m, 6H), 1.46 – 1.53 (m, 6H), 1.55 – 1.61 (m, 2H), 1.64 – 1.70 (m, 2H), 1.71 – 1.82 (m, 4H), 1.89 – 1.96 (m, 1H), 2.00 – 2.09 (m, 1H), 2.17 (t,  $J$  = 7.3 Hz, 2H), 2.26 – 2.37 (m, 1H), 2.46 (s, 3H), 3.09 – 3.15 (m, 2H), 3.27 – 3.40 (m, 6H), 3.41 (t,  $J$  = 6.4 Hz, 2H), 3.66 – 3.71 (m, 1H), 3.77 (dd,  $J$  = 4.5, 10.6 Hz, 1H), 4.06 (t,  $J$  = 6.3 Hz, 2H), 4.23 (dd,  $J$  = 5.8, 16.3 Hz, 1H), 4.31 (dd,  $J$  = 5.9, 19.1 Hz, 4H), 4.38 – 4.49 (m, 2H), 4.55 (d,  $J$  = 18.0 Hz, 1H), 4.71 (d,  $J$  = 10.8 Hz, 1H), 5.07 (d,  $J$  = 4.1 Hz, 1H), 6.99 (d,  $J$  = 7.8 Hz, 2H), 7.24 – 7.31 (m, 1H), 7.33 (d,  $J$  = 7.6 Hz, 1H), 7.36 – 7.42 (m, 2H), 7.43 – 7.53 (m, 1H), 7.55 – 7.64 (m, 3H), 7.66 – 7.73 (m, 3H), 8.21 (s, 1H), 8.34 (t,  $J$  = 6.0 Hz, 2H), 8.60 (s, 1H), 8.68 (d,  $J$  = 2.3 Hz, 1H), 8.97 (s, 1H), 9.75 (s, 1H), 12.96 (s, 1H); <sup>13</sup>C NMR (151 MHz, DMSO-*d*<sub>6</sub>)  $\delta$  12.57, 15.96, 16.80, 18.58, 18.85, 22.15, 25.67, 25.85, 26.09, 28.35, 28.85, 35.12, 37.01, 38.04, 41.69, 46.78, 53.47, 55.36, 57.76, 58.67, 67.56, 68.58, 69.59, 69.72, 69.75, 111.68, 112.28 (d,  $J$  = 23.3 Hz), 115.64, 117.50, 117.83 – 118.57 (m), 120.73, 121.82 – 122.26 (m), 122.97, 123.56, 126.81, 126.95, 127.00, 127.70, 127.86, 128.02, 128.36 – 129.05 (m), 130.95, 131.27, 131.31, 131.35, 131.53, 136.56, 138.66, 139.16, 142.17, 143.92, 147.85, 148.80, 151.37, 151.34 – 153.39 (m), 155.89, 155.93 (d,  $J$  = 240.5 Hz), 167.44, 168.08, 171.49, 172.05, 180.61; LC-MS (ESI)  $t_R$  = 11.78 min, 99% purity,  $m/z$  [M + H]<sup>+</sup> calcd for C<sub>66</sub>H<sub>77</sub>F<sub>2</sub>N<sub>8</sub>O<sub>11</sub>S<sub>2</sub>, 1259.51; found, 1259.5; HRMS (ESI)  $m/z$  [M + H]<sup>+</sup> calcd for C<sub>66</sub>H<sub>77</sub>F<sub>2</sub>N<sub>8</sub>O<sub>11</sub>S<sub>2</sub>, 1259.5116; found, 1259.5121.

### BRAF-targeting PROTAC 16b

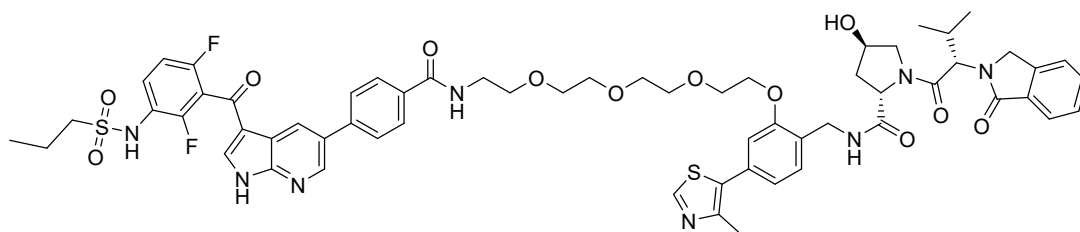

This compound was synthesized by analogy with **16a** but using conjugate **14b** (82 mg, 0.1 mmol) and BRAF ligand **6** (58 mg, 0.1 mmol). The crude product was purified by column chromatography silica gel (gradient from CH<sub>2</sub>Cl<sub>2</sub>/MeOH 19:1 to 9:1), followed by preparative HPLC (H<sub>2</sub>O/MeOH 25/75) to yield the title compound as a colourless solid.

Yield (77 mg, 64%);  $R_f = 0.22$  ( $\text{CH}_2\text{Cl}_2/\text{MeOH}$  15:1); mp 190 – 192 °C;  **$^1\text{H}$  NMR** (600 MHz,  $\text{DMSO}-d_6$ )  $\delta$  0.73 (d,  $J = 6.6$  Hz, 3H), 0.93 – 0.99 (m, 6H), 1.70 – 1.78 (m, 2H), 1.89 – 1.96 (m, 1H), 2.01 – 2.07 (m, 1H), 2.28 – 2.36 (m, 1H), 2.46 (s, 3H), 3.10 – 3.15 (m, 2H), 3.45 (q,  $J = 5.9$  Hz, 2H), 3.53 – 3.59 (m, 8H), 3.63 (dd,  $J = 3.7, 5.8$  Hz, 2H), 3.67 – 3.71 (m, 1H), 3.75 – 3.82 (m, 3H), 4.18 (dd,  $J = 3.7, 5.7$  Hz, 2H), 4.22 – 4.28 (m, 1H), 4.29 – 4.36 (m, 2H), 4.38 – 4.48 (m, 2H), 4.54 (d,  $J = 18.0$  Hz, 1H), 4.71 (d,  $J = 10.8$  Hz, 1H), 5.07 (d,  $J = 4.1$  Hz, 1H), 7.00 (dd,  $J = 1.6, 7.7$  Hz, 1H), 7.04 (d,  $J = 1.6$  Hz, 1H), 7.25 – 7.31 (m, 1H), 7.34 (d,  $J = 7.8$  Hz, 1H), 7.45 – 7.53 (m, 1H), 7.55 – 7.64 (m, 3H), 7.68 – 7.73 (m, 1H), 7.85 (d,  $J = 8.2$  Hz, 2H), 7.99 (d,  $J = 8.4$  Hz, 2H), 8.24 (s, 1H), 8.34 (t,  $J = 6.0$  Hz, 1H), 8.59 (t,  $J = 5.6$  Hz, 1H), 8.68 (s, 1H), 8.76 (d,  $J = 2.2$  Hz, 1H), 8.96 (s, 1H), 9.75 (s, 1H), 13.02 (s, 1H);  **$^{13}\text{C}$  NMR** (151 MHz,  $\text{DMSO}-d_6$ )  $\delta$  12.57, 15.97, 16.80, 18.58, 18.84, 28.35, 37.05, 38.06, 46.78, 53.48, 55.38, 57.76, 58.69, 67.90, 68.60, 68.90, 68.98, 69.62, 69.76, 69.83, 70.06, 112.17, 112.10 – 112.52 (m), 115.72, 117.48, 117.88 – 118.44 (m), 121.04, 121.72 – 122.14 (m), 122.97, 123.56, 126.87, 127.17, 127.68, 127.85, 128.03, 128.57 – 128.90 (m), 130.54, 130.96, 131.21, 131.35, 131.52, 133.27, 138.88, 140.67, 142.16, 144.10, 147.89, 149.10, 151.37, 150.96 – 153.70 (m), 155.85, 156.00 (d,  $J = 246.2$  Hz), 165.86, 167.44, 168.09, 171.52, 180.64; **LC-MS** (ESI)  $t_R = 11.13$  min, 99% purity,  $m/z$   $[\text{M} + \text{H}]^+$  calcd for  $\text{C}_{61}\text{H}_{67}\text{F}_2\text{N}_8\text{O}_{12}\text{S}_2$ , 1205.43; found, 1205.9; **HRMS** (ESI)  $m/z$   $[\text{M} + \text{H}]^+$  calcd for  $\text{C}_{61}\text{H}_{67}\text{F}_2\text{N}_8\text{O}_{12}\text{S}_2$ , 1205.4282; found, 1205.4289.

## BRAF-targeting PROTAC 16c

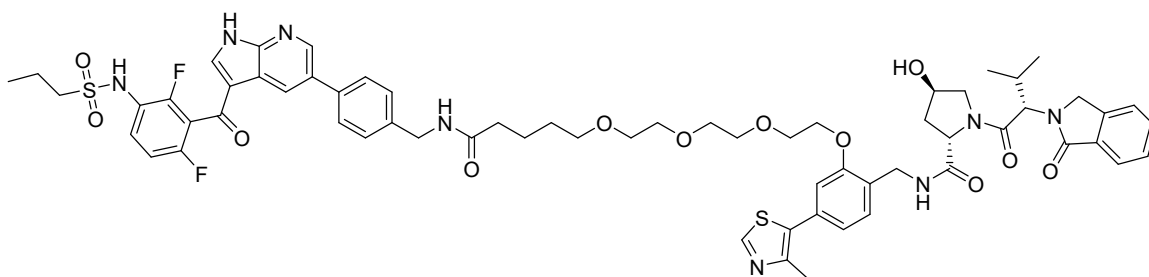

This compound was synthesized by analogy with **16a** but using conjugate **14c** (84 mg, 0.1 mmol). The crude product was purified by column chromatography silica gel (gradient from CH<sub>2</sub>Cl<sub>2</sub>/MeOH 19:1 to 9:1), followed by preparative HPLC (H<sub>2</sub>O/MeOH 25/75) to yield the title compound as a colourless solid.

Yield (52 mg, 42%);  $R_f$  = 0.42 (CH<sub>2</sub>Cl<sub>2</sub>/MeOH 12:1); mp 116 – 118 °C; <sup>1</sup>H NMR (600 MHz, DMSO-*d*<sub>6</sub>)  $\delta$  0.73 (d,  $J$  = 6.6 Hz, 3H), 0.94 – 0.98 (m, 6H), 1.46 – 1.52 (m, 2H), 1.54 – 1.60 (m, 2H), 1.70 – 1.78 (m, 2H), 1.89 – 1.95 (m, 1H), 2.01 – 2.07 (m, 1H), 2.17 (t,  $J$  = 7.4 Hz, 2H), 2.29 – 2.36 (m, 1H), 2.46 (s, 3H), 3.09 – 3.15 (m, 2H), 3.37 (t,  $J$  = 6.4 Hz, 2H), 3.44 – 3.47 (m, 2H), 3.50 – 3.57 (m, 4H), 3.60 – 3.64 (m, 2H), 3.66 – 3.81 (m, 4H), 4.18 (t,  $J$  = 4.7 Hz, 2H), 4.22 – 4.36 (m, 5H), 4.39 – 4.58 (m, 3H), 4.71 (d,  $J$  = 10.8 Hz, 1H), 5.07 (d,  $J$  = 4.0 Hz, 1H), 7.00 (dd,  $J$  = 1.6, 7.8 Hz, 1H), 7.05 (d,  $J$  = 1.6 Hz, 1H), 7.25 – 7.30 (m, 1H), 7.34 (d,  $J$  = 7.8 Hz, 1H), 7.38 (d,  $J$  = 7.9 Hz, 2H), 7.47 – 7.52 (m, 1H), 7.56 – 7.63 (m, 3H), 7.70 (dd,  $J$  = 7.8, 10.4 Hz, 3H), 8.21 (s, 1H), 8.31 – 8.36 (m, 2H), 8.60 (s, 1H), 8.68 (d,  $J$  = 2.2 Hz, 1H), 8.97 (s, 1H), 9.74 (s, 1H), 12.97 (s, 1H); <sup>13</sup>C NMR (151 MHz, DMSO-*d*<sub>6</sub>)  $\delta$  12.57, 15.98, 16.79, 18.58, 18.85, 22.09, 28.35, 28.79, 35.10, 37.04, 38.06, 41.70, 46.78, 53.48, 55.37, 57.76, 58.68, 67.90, 68.59, 68.97, 69.44, 69.80, 69.84, 69.99, 70.05, 112.18, 112.13 – 112.51 (m), 115.64, 117.49, 117.91 – 118.41 (m), 121.05, 121.95 (d,  $J$  = 14.4 Hz), 122.97, 123.57, 126.81, 127.00, 127.18, 127.69, 127.86, 128.03, 128.76, 130.95, 131.21, 131.32, 131.35, 131.53, 136.56, 138.66, 139.14, 142.17, 143.94, 147.89, 148.80, 151.39, 152.31 (d,  $J$  = 241.1 Hz), 155.86, 155.98 (d,  $J$  = 239.1 Hz), 167.45, 168.08, 171.52, 172.05, 180.59; LC-MS (ESI)  $t_R$  = 11.29 min, 99% purity,  $m/z$  [M + H]<sup>+</sup> calcd for C<sub>64</sub>H<sub>73</sub>F<sub>2</sub>N<sub>8</sub>O<sub>12</sub>S<sub>2</sub>, 1248.48; found, 1247.9; HRMS (ESI)  $m/z$  [M + Na]<sup>+</sup> calcd for C<sub>64</sub>H<sub>72</sub>F<sub>2</sub>N<sub>8</sub>NaO<sub>12</sub>S<sub>2</sub>, 1269.4571; found, 1269.4571.

**(5-Bromo-1H-pyrrolo[2,3-b]pyridin-3-yl)-(2,6-difluoro-3-nitrophenyl)methanone (18)**

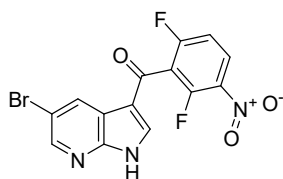

2,6-Difluoro-3-nitrobenzoic acid (**17**, 4.06 g, 20 mmol) was dissolved in dry  $\text{CH}_2\text{Cl}_2$  (100 mL). Oxalyl chloride (2M in  $\text{CH}_2\text{Cl}_2$ , 30 mL, 60 mmol) and dry DMF (5 drops) were added and the mixture was stirred under argon atmosphere for 5 h. The solvent was removed under reduced pressure. 5-Bromo-7-azaindole (**2**, 5.92 g, 30 mmol) was suspended in dry  $\text{CH}_2\text{Cl}_2$  (150 mL) and  $\text{AlCl}_3$  (20.0 g, 150 mmol) was added in portions at 0 °C. Subsequently, the *in situ* generated acid chloride in dry  $\text{CH}_2\text{Cl}_2$  (50 mL) was added dropwise, and the reaction mixture was stirred for 16 h under argon and was allowed to warm up to rt slowly. Subsequently, the mixture was poured onto a mixture of ice-cold brine and saturated  $\text{NaHCO}_3$  solution. It was extracted with EtOAc (3  $\times$  300 mL), washed with  $\text{H}_2\text{O}$  (200 mL) and brine (200 mL), dried over  $\text{Na}_2\text{SO}_4$ , filtered and evaporated. After purification by column chromatography (gradient of petroleum ether/EtOAc 1:1 to EtOAc), **18** was obtained as a pale brown solid.

Yield (3.74 g, 49%);  $R_f$  = 0.44 (petroleum ether/EtOAc 1:1); mp >250 °C;  $^1\text{H NMR}$  (500 MHz,  $\text{DMSO}-d_6$ )  $\delta$  7.45 – 7.62 (m, 1H), 8.43 (d,  $J$  = 7.6 Hz, 2H), 8.51 (d,  $J$  = 2.2 Hz, 1H), 8.64 (d,  $J$  = 2.3 Hz, 1H), 13.17 (br s, 1H);  $^{13}\text{C NMR}$  (126 MHz,  $\text{DMSO}-d_6$ )  $\delta$  113.45 (dd,  $J$  = 4.0, 23.9 Hz), 114.57, 114.83, 119.09, 119.32, 119.50, 129.21 (d,  $J$  = 11.4 Hz), 131.35, 134.50, 140.37, 145.63, 148.06, 150.02 – 164.42 (m), 178.99; LC-MS (ESI)  $t_R$  = 11.22 min, 97% purity,  $m/z$   $[\text{M} + \text{H}]^+$  calcd for  $\text{C}_{14}\text{H}_7^{79}\text{BrF}_2\text{N}_3\text{O}_3$ , 381.96; found, 381.9.

**(3-Amino-2,6-difluorophenyl)-(5-bromo-1H-pyrrolo[2,3-b]pyridin-3-yl)methanone (19)**

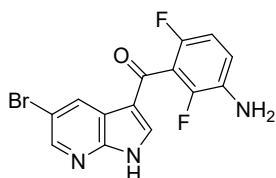

Iron (3.57 g, 64 mmol) was suspended in  $\text{H}_2\text{O}$  (80 mL) and AcOH (80 mL). Subsequently, a solution of nitro compound **18** (3.06 g, 8 mmol) in EtOH (80 mL) and AcOH (20 mL) was added slowly. The mixture was heated to 110 °C for 30 min, after which it was cooled to rt. The mixture was diluted with EtOAc (400 mL) and stirred with  $\text{NaHCO}_3$  solution (400 mL; caution,  $\text{CO}_2$  evolution!). The organic layer was separated and the aqueous phase was extracted again with EtOAc (2  $\times$  400 mL). The combined organic layers were

washed with NaHCO<sub>3</sub> solution (400 mL), dried over Na<sub>2</sub>SO<sub>4</sub>, filtered, and concentrated *in vacuo* to give a light orange solid.

Yield (2.54 g, 90%);  $R_f$  = 0.37 (petroleum ether/EtOAc 1:2); mp 250 – 252 °C (dec.); **<sup>1</sup>H NMR** (600 MHz, DMSO-*d*<sub>6</sub>) δ 5.19 (s, 2H), 6.85 – 6.96 (m, 2H), 8.12 (s, 1H), 8.48 (d,  $J$  = 2.2 Hz, 1H), 8.54 (d,  $J$  = 2.4 Hz, 1H), 13.01 (br s, 1H); **<sup>13</sup>C NMR** (151 MHz, DMSO-*d*<sub>6</sub>) δ 111.40 – 111.73 (m), 114.23, 115.31, 116.73 – 117.08 (m), 117.18 – 117.64 (m), 119.24, 131.21, 133.59 (d,  $J$  = 12.9 Hz), 138.80, 145.22, 147.86, 145.25 – 150.13 (m), 182.34; **LC-MS** (ESI)  $t_R$  = 10.34 min, 96% purity,  $m/z$  [M + H]<sup>+</sup> calcd for C<sub>14</sub>H<sub>9</sub>BrF<sub>2</sub>N<sub>3</sub>O, 351.99; found, 351.8.

#### 5-Bromo-3-[3-[[ethyl(methyl)sulfamoyl]amino]-2,6-difluorobenzoyl]-1H-pyrrolo[2,3-b]pyridine (20)

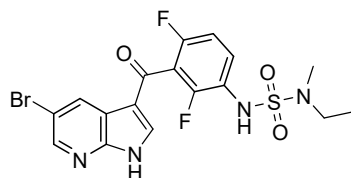

Compound **19** (1.06 g, 3 mmol) and *N*-ethyl-*N*-methylsulfamoyl chloride (1.42 g, 1.11 mL, 9 mmol) were dissolved in pyridine (30 mL) and heated to 65 °C for 16 h. The dark solution was evaporated *in vacuo* and the residue was diluted with half-saturated NH<sub>4</sub>Cl solution (100 mL). It was extracted with 10% MeOH in EtOAc (2 × 100 mL), washed with brine (100 mL), dried over Na<sub>2</sub>SO<sub>4</sub>, filtered, and concentrated *in vacuo*. The crude product was purified by flash chromatography on spherical silica gel (50 g, 30 μm, gradient from 0% to 10% MeOH in CHCl<sub>3</sub>) to yield the title compound as a light yellow solid.

Yield (0.51 g, 36%);  $R_f$  = 0.39 (10% MeOH in CHCl<sub>3</sub>); mp >250 °C; **<sup>1</sup>H NMR** (500 MHz, DMSO-*d*<sub>6</sub>) δ 1.02 (t,  $J$  = 7.1 Hz, 3H), 2.72 (s, 3H), 3.11 (q,  $J$  = 7.1 Hz, 2H), 7.26 (td,  $J$  = 1.5, 8.9 Hz, 1H), 7.57 (td,  $J$  = 5.8, 9.0 Hz, 1H), 8.16 (s, 1H), 8.50 (d,  $J$  = 2.2 Hz, 1H), 8.55 (d,  $J$  = 2.3 Hz, 1H), 9.66 (s, 1H), 13.08 (s, 1H); **<sup>13</sup>C NMR** (126 MHz, DMSO-*d*<sub>6</sub>) δ 12.95, 34.12, 45.00, 111.95 – 112.82 (m), 114.39, 115.06, 117.38 – 118.59 (m), 119.15, 122.69 (d,  $J$  = 13.7 Hz), 128.37 (d,  $J$  = 9.7 Hz), 131.20, 139.13, 145.44, 147.91, 150.34 – 157.42 (m), 180.79; **LC-MS** (ESI)  $t_R$  = 6.50 min, 99% purity,  $m/z$  [M + H]<sup>+</sup> calcd for C<sub>17</sub>H<sub>16</sub><sup>79</sup>BrF<sub>2</sub>N<sub>4</sub>O<sub>3</sub>S, 473.01; found, 473.2; **HRMS** (ESI)  $m/z$  [M + H]<sup>+</sup> calcd for C<sub>15</sub>H<sub>19</sub>N<sub>2</sub>O<sub>4</sub>, 473.0089; found, 473.0083.

**tert-Butyl 4-[4-[3-[3-[[ethyl(methyl)sulfamoyl]amino]-2,6-difluorobenzoyl]-1*H*-pyrrolo[2,3-*b*]pyridin-5-yl]phenyl]piperazine-1-carboxylate (21)**

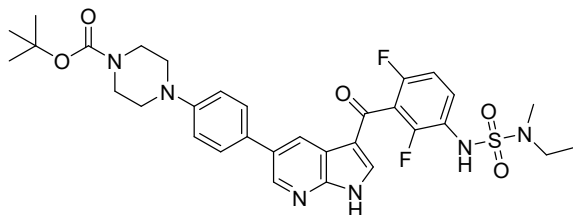

Compound **20** (236 mg, 0.5 mmol) was dissolved in dry dioxane (20 mL) and the solution was purged with argon. 4-(4-Boc-piperazino)phenylboronic acid pinacol ester (233 mg, 0.6 mmol),  $K_2CO_3$  (207 mg, 1.5 mmol), tricyclohexylphosphine (14 mg, 0.05 mmol), and bis(dibenzylidenacetone)palladium(0) (14 mg, 0.025 mmol) were added. The mixture was heated at 90 °C 3 h, after which a second portion of  $Pd(dba)_2$  (14 mg) was added. After stirring for another 3 h at 90 °C, it was cooled, diluted with EtOAc (100 mL), and washed with half-saturated brine (50 mL). The organic layer was dried over  $Na_2SO_4$ , filtered, and concentrated *in vacuo*. The crude product was purified by flash chromatography on spherical silica gel (50 g, 30  $\mu$ m, gradient from 10% to 100% EtOAc in cyclohexane) to yield the title compound as a light yellow solid.

Yield (154 mg, 47%);  $R_f$  = 0.26 (80% EtOAc in cyclohexane); mp 216 – 220 °C;  $^1H$  NMR (600 MHz,  $DMSO-d_6$ )  $\delta$  1.00 (t,  $J$  = 7.1 Hz, 3H), 1.42 (s, 9H), 2.71 (s, 3H), 3.10 (q,  $J$  = 7.1 Hz, 2H), 3.18 (dd,  $J$  = 4.0, 6.3 Hz, 4H), 3.48 (t,  $J$  = 5.2 Hz, 4H), 7.06 – 7.10 (m, 2H), 7.26 (td,  $J$  = 1.5, 8.8 Hz, 1H), 7.53 – 7.63 (m, 3H), 8.07 (s, 1H), 8.52 (s, 1H), 8.65 (d,  $J$  = 2.3 Hz, 1H), 9.67 (s, 1H), 12.89 (s, 1H);  $^{13}C$  NMR (151 MHz,  $DMSO-d_6$ )  $\delta$  12.98, 28.24, 34.13, 45.03, 48.22, 79.17, 111.89 – 112.97 (m), 115.73, 116.46, 117.71, 118.32 (t,  $J$  = 23.2 Hz), 122.66 (d,  $J$  = 13.3 Hz), 126.16, 127.80, 128.22 (d,  $J$  = 9.8 Hz), 128.86, 131.63, 138.29, 143.76, 148.54, 150.49, 152.12 (dd,  $J$  = 8.7, 249.8 Hz), 154.05, 155.77 (dd,  $J$  = 6.9, 245.9 Hz), 180.75; **LC-MS** (ESI)  $t_R$  = 7.85 min, 96% purity,  $m/z$   $[M + H]^+$  calcd for  $C_{32}H_{37}F_2N_6O_5S$ , 655.25; found, 655.4; **HRMS** (ESI)  $m/z$   $[M + H]^+$  calcd for  $C_{32}H_{37}F_2N_6O_5S$ , 665.2509; found, 665.2493.

***tert*-Butyl 4-[5-[3-[3-[[ethyl(methyl)sulfamoyl]amino]-2,6-difluorobenzoyl]-1*H*-pyrrolo[2,3-*b*]pyridin-5-yl]pyrimidin-2-yl]piperazine-1-carboxylate (22)**

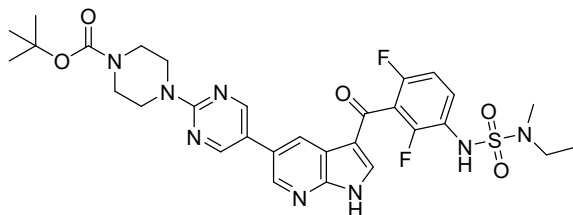

This compound was synthesized by analogy with **21** but using 2-(4-Boc-piperazino)pyrimidine-5-boronic acid pinacol ester (234 mg, 0.6 mmol). The crude product was purified by flash chromatography on spherical silica gel (50 g, 30  $\mu$ m, gradient from 50% to 100% EtOAc in cyclohexane) to yield the title compound as a light yellow solid.

Yield (171 mg, 52%);  $R_f$  = 0.38 (80% EtOAc in cyclohexane); mp >250 °C; **<sup>1</sup>H NMR** (600 MHz, DMSO-*d*<sub>6</sub>)  $\delta$  1.01 (t,  $J$  = 7.1 Hz, 3H), 1.43 (s, 9H), 2.72 (s, 3H), 3.10 (q,  $J$  = 7.1 Hz, 2H), 3.43 (t,  $J$  = 5.3 Hz, 4H), 3.77 – 3.82 (m, 4H), 7.23 – 7.29 (m, 1H), 7.57 (td,  $J$  = 5.9, 9.0 Hz, 1H), 8.11 (s, 1H), 8.54 (s, 1H), 8.65 (d,  $J$  = 2.2 Hz, 1H), 8.77 (s, 2H), 9.67 (s, 1H), 12.97 (s, 1H); **<sup>13</sup>C NMR** (151 MHz, DMSO-*d*<sub>6</sub>)  $\delta$  12.97, 28.24, 34.12, 43.47, 45.02, 79.25, 112.37 (d,  $J$  = 22.9 Hz), 115.74, 117.67, 117.88 – 118.89 (m), 120.82, 122.30 – 123.15 (m), 126.26, 126.64, 128.29 (d,  $J$  = 9.6 Hz), 138.52, 143.41, 148.87, 152.14 (dd,  $J$  = 8.7, 249.7 Hz), 154.11, 155.77 (dd,  $J$  = 6.8, 246.2 Hz), 156.36, 160.64, 180.73; **LC-MS** (ESI)  $t_R$  = 7.69 min, 99% purity,  $m/z$  [M + H]<sup>+</sup> calcd for C<sub>30</sub>H<sub>35</sub>F<sub>2</sub>N<sub>8</sub>O<sub>5</sub>S, 657.24; found, 655.4; **HRMS** (ESI)  $m/z$  [M + H]<sup>+</sup> calcd for C<sub>30</sub>H<sub>35</sub>F<sub>2</sub>N<sub>8</sub>O<sub>5</sub>S, 657.2414; found, 657.2402.

***tert*-Butyl 2-[4-[4-[3-[3-[[ethyl(methyl)sulfamoyl]amino]-2,6-difluorobenzoyl]-1*H*-pyrrolo[2,3-*b*]pyridin-5-yl]phenyl]piperazin-1-yl]acetate (23)**

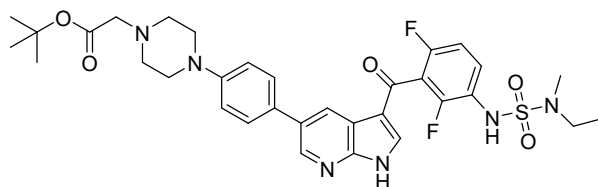

Compound **21** (0.15 g, 0.23 mmol) was treated with 4N HCl in dioxane (5 mL) for 3 h at rt. The orange solid was filtered, washed with dry dioxane (2  $\times$  5 mL), and the salt was dried *in vacuo*. The material was dissolved in dry DMF (10 mL), DIPEA (0.12 mL, 0.69 mmol) and *tert*-butyl bromoacetate (37  $\mu$ L, 0.25 mmol), and the mixture was stirred at rt for 3 h. It was diluted with CH<sub>2</sub>Cl<sub>2</sub> (30 mL), washed with

saturated  $\text{NH}_4\text{Cl}$  solution, and extracted again with  $\text{CH}_2\text{Cl}_2$  (30 mL). The combined organic layers were washed with 5%  $\text{LiCl}$  solution and brine (each 50 mL), dried over  $\text{Na}_2\text{SO}_4$ , filtered, and evaporated. The crude product was purified by flash chromatography on spherical silica gel (25 g, 15  $\mu\text{m}$ , gradient from 0% to 7% MeOH in  $\text{CH}_2\text{Cl}_2$ ) to yield the title compound as an orange solid.

Yield (94 mg, 61%);  $R_f$  = 0.45 (7% MeOH in  $\text{CH}_2\text{Cl}_2$ ); mp 202 – 204  $^\circ\text{C}$ ;  $^1\text{H NMR}$  (500 MHz,  $\text{DMSO}-d_6$ )  $\delta$  1.01 (t,  $J$  = 7.1 Hz, 3H), 1.42 (s, 9H), 2.66 (t,  $J$  = 5.0 Hz, 4H), 2.72 (s, 3H), 3.10 (q,  $J$  = 7.1 Hz, 2H), 3.17 (s, 2H), 3.21 (t,  $J$  = 5.0 Hz, 4H), 7.03 – 7.09 (m, 2H), 7.26 (td,  $J$  = 1.5, 8.7 Hz, 1H), 7.53 – 7.61 (m, 3H), 8.06 (s, 1H), 8.51 (s, 1H), 8.64 (d,  $J$  = 2.2 Hz, 1H), 9.66 (s, 1H), 12.87 (s, 1H);  $^{13}\text{C NMR}$  (126 MHz,  $\text{DMSO}-d_6$ )  $\delta$  12.95, 27.96, 34.11, 45.00, 48.09, 51.94, 59.39, 80.35, 112.31 (d,  $J$  = 22.0 Hz), 115.70, 115.93, 117.69, 118.32 (t,  $J$  = 23.5 Hz), 122.68 (d,  $J$  = 14.2 Hz), 126.03, 127.71, 127.80 – 128.44 (m), 128.30, 131.69, 138.17, 143.70, 148.47, 150.57, 152.09 (dd,  $J$  = 8.2, 249.8 Hz), 154.34 – 157.52 (m), 169.37, 180.72.; **LC-MS** (ESI)  $t_R$  = 7.86 min, 98% purity,  $m/z$   $[\text{M} + \text{H}]^+$  calcd for  $\text{C}_{33}\text{H}_{39}\text{F}_2\text{N}_6\text{O}_5\text{S}$ , 669.27; found, 669.5; **HRMS** (ESI)  $m/z$   $[\text{M} + \text{H}]^+$  calcd for  $\text{C}_{33}\text{H}_{39}\text{F}_2\text{N}_6\text{O}_5\text{S}$ , 669.2665; found, 669.2651.

***tert*-Butyl 2-[4-[5-[3-[3-[[ethyl(methyl)sulfamoyl]amino]-2,6-difluoro-benzoyl]-1*H*-pyrrolo[2,3-*b*]pyridin-5-yl]pyrimidin-2-yl]piperazin-1-yl]acetate (**24**)**

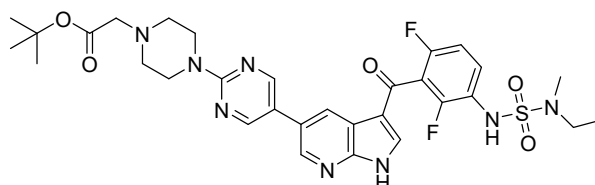

This compound was synthesized by analogy with **23** but using precursor **22** (0.15 g, 0.23 mmol). The crude product was purified by flash chromatography on spherical silica gel (25 g, 15  $\mu\text{m}$ , gradient from 0% to 7% MeOH in  $\text{CH}_2\text{Cl}_2$ ) to yield the title compound as a colourless solid.

Yield (79 mg, 51%);  $R_f$  = 0.29 (7% MeOH in  $\text{CH}_2\text{Cl}_2$ ); mp 238 – 240  $^\circ\text{C}$ ;  $^1\text{H NMR}$  (600 MHz,  $\text{DMSO}-d_6$ )  $\delta$  1.01 (t,  $J$  = 7.1 Hz, 3H), 1.41 (s, 9H), 2.57 – 2.62 (m, 4H), 2.72 (s, 3H), 3.10 (q,  $J$  = 7.1 Hz, 2H), 3.17 (s, 2H), 3.78 – 3.82 (m, 4H), 7.23 – 7.29 (m, 1H), 7.53 – 7.60 (m, 1H), 8.11 (s, 1H), 8.53 (s, 1H), 8.65 (d,  $J$  = 2.2 Hz, 1H), 8.74 (s, 2H), 9.67 (s, 1H), 12.96 (s, 1H);  $^{13}\text{C NMR}$  (151 MHz,  $\text{DMSO}-d_6$ )  $\delta$  12.98, 27.98, 34.13, 43.73, 45.03, 51.79, 59.33, 80.41, 111.83 – 112.78 (m), 115.73, 117.68, 118.02 – 118.57 (m), 120.52, 122.65 (d,  $J$  = 13.2 Hz), 126.18, 126.74, 128.28 (d,  $J$  = 9.9 Hz), 138.48, 143.39, 148.84, 152.14 (dd,  $J$  = 8.7, 249.7 Hz), 154.05 – 157.72 (m), 156.32, 160.72, 169.40, 180.73; **LC-MS** (ESI)  $t_R$  = 7.41 min, 99% purity,  $m/z$   $[\text{M} + \text{H}]^+$  calcd for

C<sub>31</sub>H<sub>37</sub>F<sub>2</sub>N<sub>8</sub>O<sub>5</sub>S, 671.26; found, 671.4; **HRMS** (ESI) *m/z* [M + H]<sup>+</sup> calcd for C<sub>31</sub>H<sub>37</sub>F<sub>2</sub>N<sub>8</sub>O<sub>5</sub>S, 671.2570; found, 671.2555.

### Paradox-breaker PROTAC 25

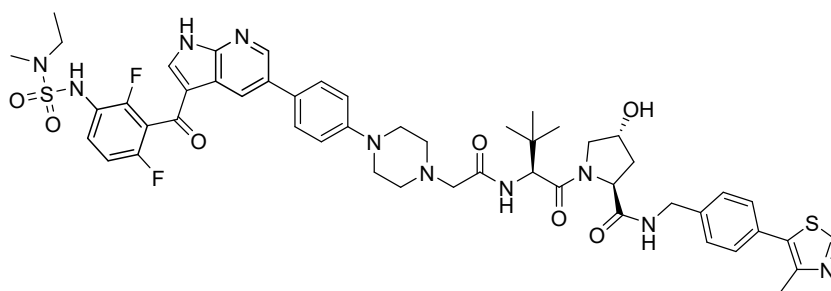

Yield (63 mg, 61%); *R<sub>f</sub>* = 0.44 (10% MeOH in CH<sub>2</sub>Cl<sub>2</sub>); mp 212 – 214 °C; **<sup>1</sup>H NMR** (600 MHz, DMSO-*d*<sub>6</sub>) δ 0.96 (s, 9H), 1.01 (t, *J* = 7.1 Hz, 3H), 1.86 – 1.94 (m, 1H), 2.02 – 2.09 (m, 1H), 2.39 (s, 3H), 2.62 – 2.70 (m, 4H), 2.72 (s, 3H), 3.01 – 3.16 (m, 4H), 3.21 – 3.29 (m, 4H), 3.62 (d, *J* = 10.6 Hz, 1H), 3.67 (dd, *J* = 4.0, 10.7 Hz, 1H), 4.25 (dd, *J* = 5.7, 15.7 Hz, 1H), 4.34 – 4.48 (m, 3H), 4.53 (d, *J* = 9.6 Hz, 1H), 5.13 (d, *J* = 3.5 Hz, 1H), 7.05 – 7.11 (m, 2H), 7.23 – 7.29 (m, 1H), 7.34 – 7.43 (m, 4H), 7.53 – 7.62 (m, 3H), 7.83 (d, *J* = 9.6 Hz, 1H), 8.07 (s, 1H), 8.53 (s, 1H), 8.57 (t, *J* = 6.1 Hz, 1H), 8.64 (d, *J* = 2.3 Hz, 1H), 8.90 (s, 1H), 9.67 (s, 1H), 12.89 (s, 1H); **<sup>13</sup>C NMR** (151 MHz, DMSO-*d*<sub>6</sub>) δ 12.97, 16.04, 26.41, 34.12, 35.93, 38.02, 41.82, 45.02, 48.33, 52.91, 56.02, 56.69, 58.95, 60.76, 69.06, 112.34 (d, *J* = 20.1 Hz), 115.72, 115.99, 117.71, 118.32 (t, *J* = 23.5 Hz), 122.68 (d, *J* = 12.5 Hz), 126.10, 127.68, 127.73, 128.49, 128.06 – 129.26 (m), 128.79, 129.85, 131.28, 131.66, 138.27, 139.58, 143.73, 147.85, 148.51, 150.45, 151.45, 152.10 (dd, *J* = 8.0, 249.7 Hz), 155.74 (dd, *J* = 6.7, 246.3 Hz), 168.65, 169.46, 171.92, 180.75; **LC-MS** (ESI) *t<sub>R</sub>* = 6.65 min, 98% purity, *m/z* [M + H]<sup>+</sup> calcd for C<sub>51</sub>H<sub>59</sub>F<sub>2</sub>N<sub>10</sub>O<sub>7</sub>S<sub>2</sub>, 1025.40; found, 1025.7; **HRMS** (ESI) *m/z* [M + H]<sup>+</sup> calcd for C<sub>51</sub>H<sub>59</sub>F<sub>2</sub>N<sub>10</sub>O<sub>7</sub>S<sub>2</sub>, 1025.3972; found, 1025.3958.

**(2*S*,4*R*)-1-[(2*S*)-2-amino-3,3-dimethyl-butanoyl]-4-hydroxy-*N*-[(1*S*)-1-[4-(4-methylthiazol-5-yl)phenyl]ethyl]pyrrolidine-2-carboxamide (27)**

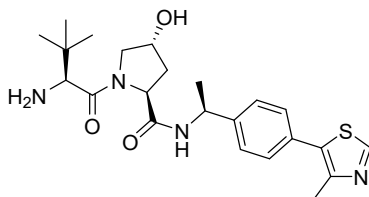

This compound was synthesized as we described previously.<sup>13</sup>

**Paradox-breaker PROTAC 26**

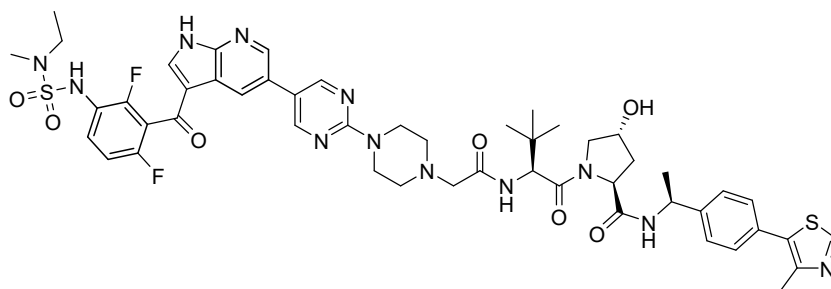

Yield (69 mg, 66%);  $R_f$  = 0.44 (10% MeOH in  $\text{CH}_2\text{Cl}_2$ ); mp 208 – 210 °C;  $^1\text{H NMR}$  (600 MHz,  $\text{DMSO}-d_6$ )  $\delta$  0.96 (s, 9H), 1.01 (t,  $J$  = 7.1 Hz, 3H), 1.37 (d,  $J$  = 7.0 Hz, 3H), 1.74 – 1.81 (m, 1H), 2.02 – 2.09 (m, 1H), 2.44 (s, 3H), 2.58 (h,  $J$  = 6.8 Hz, 4H), 2.72 (s, 3H), 3.01 – 3.15 (m, 4H), 3.56 – 3.64 (m, 2H), 3.80 – 3.89 (m, 4H), 4.26 – 4.31 (m, 1H), 4.46 (t,  $J$  = 8.2 Hz, 1H), 4.52 (d,  $J$  = 9.6 Hz, 1H), 4.90 (p,  $J$  = 7.1 Hz, 1H), 5.11 (d,  $J$  = 3.5 Hz, 1H), 7.23 – 7.29 (m, 1H), 7.32 – 7.39 (m, 2H), 7.40 – 7.45 (m, 2H), 7.53 – 7.60 (m, 1H), 7.80 (d,  $J$  = 9.6 Hz, 1H), 8.11 (s, 1H), 8.42 (d,  $J$  = 7.7 Hz, 1H), 8.54 (s, 1H), 8.64 – 8.71 (m, 1H), 8.76 (s, 2H), 8.96 (s, 1H), 9.67 (s, 1H), 12.96 (s, 1H);  $^{13}\text{C NMR}$  (151 MHz,  $\text{DMSO}-d_6$ )  $\delta$  12.97, 16.14, 22.64, 26.48, 34.13, 35.88, 37.91, 43.88, 45.03, 47.94, 52.76, 56.07, 56.67, 58.70, 60.82, 68.94, 112.37 (d,  $J$  = 23.9 Hz), 115.75, 117.68, 118.26 (t,  $J$  = 23.2 Hz), 120.72, 122.67 (d,  $J$  = 11.3 Hz), 126.24, 126.47, 126.69, 128.28 (d,  $J$  = 10.1 Hz), 128.99, 129.04, 129.84, 131.27, 138.51, 143.42, 144.93, 147.91, 148.86, 151.60, 152.14 (dd,  $J$  = 8.1, 249.7 Hz), 155.77 (dd,  $J$  = 6.9, 246.1 Hz), 156.34, 160.71, 168.68, 169.38, 170.65, 180.74; **LC-MS** (ESI)  $t_R$  = 6.73 min, 99% purity,  $m/z$   $[\text{M} + \text{H}]^+$  calcd for  $\text{C}_{50}\text{H}_{59}\text{F}_2\text{N}_{12}\text{O}_7\text{S}_2$ , 1041.40; found, 1041.7; **HRMS** (ESI)  $m/z$   $[\text{M} + \text{H}]^+$  calcd for  $\text{C}_{50}\text{H}_{59}\text{F}_2\text{N}_{12}\text{O}_7\text{S}_2$ , 1041.4034; found, 1041.4019.

**BRAF<sup>V600E</sup> PROTAC “cmpd 12”**<sup>12</sup>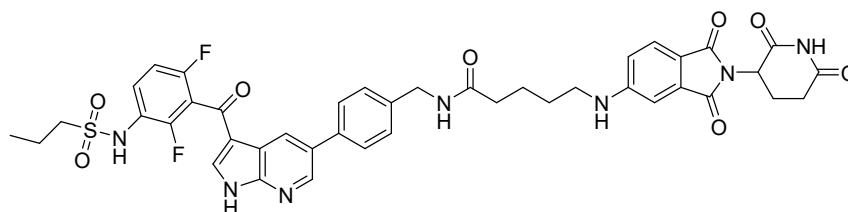

This compound was synthesized as described previously.<sup>12</sup>

Yield (63%);  $R_f$  = 0.25 (5% MeOH/CH<sub>2</sub>Cl<sub>2</sub>); mp 174 – 176 °C; <sup>1</sup>H NMR (600 MHz, DMSO-*d*<sub>6</sub>) δ 0.95 (t,  $J$  = 7.4 Hz, 3H), 1.55 – 1.62 (m, 2H), 1.62 – 1.69 (m, 2H), 1.69 – 1.78 (m, 2H), 1.93 – 2.01 (m, 1H), 2.22 (t,  $J$  = 7.2 Hz, 2H), 2.44 – 2.59 (m, 2H), 2.81 – 2.90 (m, 1H), 3.08 – 3.14 (m, 2H), 3.18 (q,  $J$  = 6.5 Hz, 2H), 4.33 (d,  $J$  = 5.9 Hz, 2H), 5.01 (dd,  $J$  = 5.4, 12.9 Hz, 1H), 6.85 (dd,  $J$  = 2.1, 8.4 Hz, 1H), 6.95 (d,  $J$  = 2.2 Hz, 1H), 7.11 (t,  $J$  = 5.4 Hz, 1H), 7.24 – 7.30 (m, 1H), 7.38 (d,  $J$  = 7.9 Hz, 2H), 7.52 – 7.61 (m, 2H), 7.68 (d,  $J$  = 7.9 Hz, 2H), 8.21 (s, 1H), 8.37 (t,  $J$  = 6.0 Hz, 1H), 8.59 (s, 1H), 8.67 (d,  $J$  = 2.2 Hz, 1H), 9.74 (s, 1H), 11.02 (s, 1H), 12.96 (s, 1H); <sup>13</sup>C NMR (151 MHz, DMSO-*d*<sub>6</sub>) δ 12.75, 16.98, 22.38, 23.05, 28.03, 31.14, 35.16, 41.90, 42.37, 48.78, 53.66, 112.48 (d,  $J$  = 23.2 Hz), 115.24, 115.82, 116.00, 117.67, 118.05 – 119.00 (m), 122.18 (d,  $J$  = 12.8 Hz), 125.22, 126.99, 127.20, 128.22, 128.89 (d,  $J$  = 9.7 Hz), 131.48, 134.39, 136.76, 138.87, 139.29, 144.11, 148.98, 152.49 (dd,  $J$  = 8.7, 249.7 Hz), 154.62, 156.14 (dd,  $J$  = 6.9, 246.7 Hz), 167.29, 167.86, 170.30, 172.15, 172.93, 180.79; LC-MS (ESI)  $t_R$  = 6.02 min, 98% purity,  $m/z$  [M + H]<sup>+</sup> calcd for C<sub>42</sub>H<sub>40</sub>F<sub>2</sub>N<sub>7</sub>O<sub>8</sub>S, 840.26; found, 840.5.

**BRAF<sup>V600E</sup> PROTAC SJF-0628**<sup>16</sup>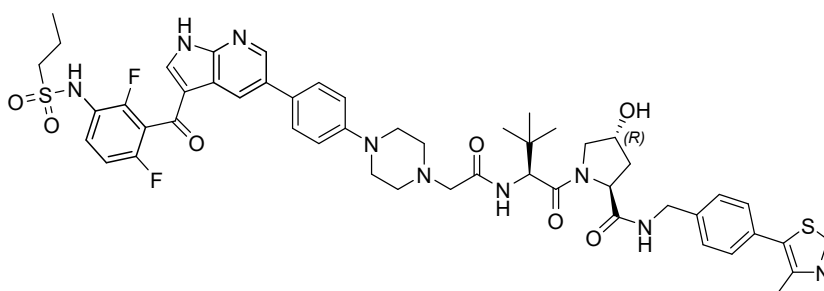

This compound was synthesized as described previously.<sup>16</sup>

Yield (64%);  $R_f$  = 0.31 (7% MeOH/CH<sub>2</sub>Cl<sub>2</sub>); mp 164 – 166 °C; <sup>1</sup>H NMR (600 MHz, DMSO-*d*<sub>6</sub>) δ 0.90 – 1.00 (m, 12H), 1.73 (h,  $J$  = 7.5 Hz, 2H), 1.86 – 1.94 (m, 1H), 2.02 – 2.09 (m, 1H), 2.39 (s, 3H), 2.61 – 2.72 (m, 4H), 3.01 – 3.16 (m, 4H), 3.21 – 3.29 (m, 4H), 3.60 – 3.71 (m, 2H), 4.25 (dd,  $J$  = 5.7, 15.8 Hz, 1H), 4.35 – 4.48 (m, 3H), 4.53 (d,  $J$  = 9.6 Hz, 1H), 5.13 (d,  $J$  = 3.5 Hz, 1H), 7.08 (d,  $J$  = 8.8 Hz, 2H), 7.26 (t,  $J$  = 8.6 Hz, 1H), 7.34 –

7.47 (m, 4H), 7.52 – 7.62 (m, 3H), 7.83 (d,  $J = 9.6$  Hz, 1H), 8.16 (s, 1H), 8.54 (s, 1H), 8.57 (t,  $J = 6.1$  Hz, 1H), 8.64 (d,  $J = 2.3$  Hz, 1H), 8.90 (s, 1H), 9.74 (s, 1H), 12.89 (s, 1H);  $^{13}\text{C}$  NMR (151 MHz, DMSO- $d_6$ )  $\delta$  12.77, 16.04, 17.00, 26.42, 35.94, 38.02, 41.83, 48.34, 52.91, 53.65, 56.03, 56.70, 58.96, 60.77, 69.06, 112.44 (d,  $J = 23.5$  Hz), 115.77, 116.00, 117.74, 118.41 (t,  $J = 23.6$  Hz), 121.85 – 122.84 (m), 126.12, 127.68, 127.73, 128.50, 128.19 – 129.16 (m), 128.80, 129.85, 131.28, 131.64, 138.57, 139.59, 143.71, 147.86, 148.55, 150.45, 151.45, 152.46 (dd,  $J = 8.2, 249.4$  Hz), 154.76 – 157.38 (m), 168.67, 169.46, 171.93, 180.76; **LC-MS** (ESI)  $t_R = 6.81$  min, 95% purity,  $m/z$   $[\text{M} + \text{H}]^+$  calcd for  $\text{C}_{51}\text{H}_{58}\text{F}_2\text{N}_9\text{O}_7\text{S}_2$ , 1010.39; found, 1010.7.

**BRAF<sup>V600E</sup> PROTAC SJF-0661 (negative control)** <sup>16</sup>

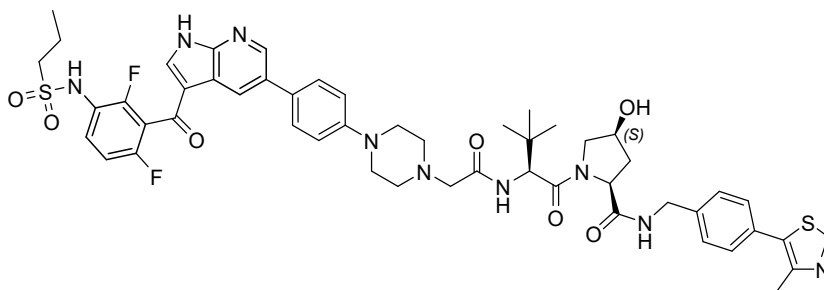

This compound was synthesized as described previously.<sup>16</sup>

Yield (65%);  $R_f = 0.26$  (7% MeOH/ $\text{CH}_2\text{Cl}_2$ ); mp 204 – 210 °C;  $^1\text{H}$  NMR (600 MHz, DMSO- $d_6$ )  $\delta$  0.95 (t,  $J = 7.4$  Hz, 3H), 0.98 (s, 9H), 1.69 – 1.79 (m, 2H), 1.91 – 1.99 (m, 1H), 2.02 – 2.10 (m, 1H), 2.38 (s, 3H), 2.56 – 2.67 (m, 4H), 2.86 – 3.23 (m, 8H), 3.59 (dd,  $J = 3.3, 10.1$  Hz, 1H), 3.75 (dd,  $J = 4.8, 10.4$  Hz, 1H), 4.28 – 4.45 (m, 4H), 4.50 (d,  $J = 9.0$  Hz, 1H), 5.12 (d,  $J = 3.8$  Hz, 1H), 6.93 – 6.98 (m, 2H), 7.24 – 7.30 (m, 1H), 7.35 – 7.43 (m, 4H), 7.52 (d,  $J = 8.4$  Hz, 2H), 7.54 – 7.62 (m, 1H), 7.72 (d,  $J = 8.8$  Hz, 1H), 8.16 (s, 1H), 8.32 (t,  $J = 6.0$  Hz, 1H), 8.52 (s, 1H), 8.61 (d,  $J = 2.2$  Hz, 1H), 8.91 (s, 1H), 9.72 (s, 1H), 12.89 (s, 1H);  $^{13}\text{C}$  NMR (151 MHz, DMSO- $d_6$ )  $\delta$  12.75, 16.08, 16.97, 26.53, 34.94, 38.06, 41.76, 48.28, 52.72, 53.66, 55.68, 56.30, 58.87, 60.77, 68.71, 112.48 (d,  $J = 23.0$  Hz), 115.76, 115.87, 117.72, 118.42 (t,  $J = 23.6$  Hz), 121.70 – 122.42 (m), 127.62, 127.65, 127.95 – 129.27 (m), 128.93, 129.97, 131.24, 131.63, 138.57, 139.51, 143.66, 147.91, 148.53, 150.41, 151.46, 152.50 (dd,  $J = 8.1, 249.3$  Hz), 156.18 (dd,  $J = 6.7, 246.5$  Hz), 169.41, 169.45, 171.66, 180.71; **LC-MS** (ESI)  $t_R = 6.46$  min, 97% purity,  $m/z$   $[\text{M} + \text{H}]^+$  calcd for  $\text{C}_{51}\text{H}_{58}\text{F}_2\text{N}_9\text{O}_7\text{S}_2$ , 1010.39; found, 1010.6.

## K. Crystallographic data and structure refinement

|                                                |                                                                |
|------------------------------------------------|----------------------------------------------------------------|
| Crystal Habitus                                | clear colourless plank                                         |
| Device Type                                    | Bruker X8-KappaApexII                                          |
| Empirical formula                              | $C_{17}H_{14}N_3O_3F_2SBr$                                     |
| Formula weight                                 | 458.28                                                         |
| Temperature/K                                  | 100                                                            |
| Crystal system                                 | Triclinic                                                      |
| Space group                                    | P-1                                                            |
| a/Å                                            | 6.4327(4)                                                      |
| b/Å                                            | 7.6898(6)                                                      |
| c/Å                                            | 18.8782(14)                                                    |
| $\alpha/^\circ$                                | 90.654(4)                                                      |
| $\beta/^\circ$                                 | 91.728(4)                                                      |
| $\gamma/^\circ$                                | 103.495(4)                                                     |
| Volume/Å <sup>3</sup>                          | 907.47(11)                                                     |
| Z                                              | 2                                                              |
| $\rho_{\text{calc}}/\text{g/cm}^3$             | 1.677                                                          |
| $\mu/\text{mm}^{-1}$                           | 2.423                                                          |
| F(000)                                         | 460.0                                                          |
| Crystal size/mm <sup>3</sup>                   | 0.22 × 0.08 × 0.02                                             |
| Absorption correction                          | empirical                                                      |
| Tmin; Tmax                                     | 0.6154; 0.7460                                                 |
| Radiation                                      | MoK $\alpha$ ( $\lambda$ = 0.71073)                            |
| 2 $\theta$ range for data collection/ $^\circ$ | 5.448 to 55.996 $^\circ$                                       |
| Completeness to theta                          | 0.998                                                          |
| Index ranges                                   | -8 ≤ h ≤ 8, -10 ≤ k ≤ 10, -24 ≤ l ≤ 24                         |
| Reflections collected                          | 33623                                                          |
| Independent reflections                        | 4393 [ $R_{\text{int}}$ = 0.0848, $R_{\text{sigma}}$ = 0.0537] |
| Data/restraints/parameters                     | 4393/0/245                                                     |
| Goodness-of-fit on F <sup>2</sup>              | 1.009                                                          |
| Final R indexes [ $I \geq 2\sigma(I)$ ]        | $R_1$ = 0.0344, $wR_2$ = 0.0745                                |
| Final R indexes [all data]                     | $R_1$ = 0.0609, $wR_2$ = 0.0841                                |
| Largest diff. peak/hole / e Å <sup>-3</sup>    | 0.74/-0.79                                                     |

**Bond lengths**

| Atom | Atom | Length/Å   | Atom | Atom | Length/Å |
|------|------|------------|------|------|----------|
| Br   | C4   | 1.891(3)   | C1   | C8   | 1.439(4) |
| S    | O2   | 1.431(2)   | C2   | C3   | 1.394(3) |
| S    | O3   | 1.4414(19) | C2   | C6   | 1.413(4) |
| S    | N3   | 1.640(2)   | C3   | C4   | 1.378(4) |
| S    | C15  | 1.755(3)   | C4   | C5   | 1.396(4) |
| F1   | C10  | 1.350(3)   | C8   | C9   | 1.517(4) |
| F2   | C14  | 1.357(3)   | C9   | C10  | 1.386(4) |
| O1   | C8   | 1.218(3)   | C9   | C14  | 1.379(4) |
| N1   | C6   | 1.375(3)   | C10  | C11  | 1.383(4) |
| N1   | C7   | 1.341(4)   | C11  | C12  | 1.377(4) |
| N2   | C5   | 1.335(3)   | C12  | C13  | 1.387(4) |
| N2   | C6   | 1.329(3)   | C13  | C14  | 1.377(4) |
| N3   | C11  | 1.430(3)   | C15  | C16  | 1.514(4) |
| C1   | C2   | 1.438(4)   | C16  | C17  | 1.518(5) |
| C1   | C7   | 1.383(4)   |      |      |          |

**Bond angles**

| Atom | Atom | Atom | Angle/°    | Atom | Atom | Atom | Angle/°  |
|------|------|------|------------|------|------|------|----------|
| O2   | S    | O3   | 118.95(13) | N2   | C6   | C2   | 126.3(2) |
| O2   | S    | N3   | 109.59(12) | N1   | C7   | C1   | 110.9(2) |
| O2   | S    | C15  | 108.86(13) | O1   | C8   | C1   | 124.1(3) |
| O3   | S    | N3   | 104.66(12) | O1   | C8   | C9   | 118.7(2) |
| O3   | S    | C15  | 108.46(13) | C1   | C8   | C9   | 117.1(2) |
| N3   | S    | C15  | 105.50(13) | C10  | C9   | C8   | 122.9(3) |
| C7   | N1   | C6   | 108.7(2)   | C14  | C9   | C8   | 121.3(2) |
| C6   | N2   | C5   | 115.2(2)   | C14  | C9   | C10  | 115.8(2) |
| C11  | N3   | S    | 119.38(18) | F1   | C10  | C9   | 118.2(2) |
| C2   | C1   | C8   | 126.9(2)   | F1   | C10  | C11  | 118.7(2) |
| C7   | C1   | C2   | 106.1(2)   | C11  | C10  | C9   | 123.0(3) |
| C7   | C1   | C8   | 127.1(2)   | C10  | C11  | N3   | 120.9(3) |

|    |    |    |            |     |     |     |          |
|----|----|----|------------|-----|-----|-----|----------|
| C3 | C2 | C1 | 136.8(2)   | C12 | C11 | N3  | 120.6(2) |
| C3 | C2 | C6 | 117.4(2)   | C12 | C11 | C10 | 118.5(3) |
| C6 | C2 | C1 | 105.8(2)   | C11 | C12 | C13 | 120.9(3) |
| C4 | C3 | C2 | 116.5(2)   | C14 | C13 | C12 | 118.0(3) |
| C3 | C4 | Br | 119.90(19) | F2  | C14 | C9  | 117.6(2) |
| C3 | C4 | C5 | 121.8(2)   | F2  | C14 | C13 | 118.6(3) |
| C5 | C4 | Br | 118.3(2)   | C13 | C14 | C9  | 123.8(3) |
| N2 | C5 | C4 | 122.8(3)   | C16 | C15 | S   | 114.7(2) |
| N1 | C6 | C2 | 108.5(2)   | C15 | C16 | C17 | 110.3(3) |
| N2 | C6 | N1 | 125.2(2)   |     |     |     |          |

## L. Selected NMR and LC/MS traces

$^1\text{H}$  and  $^{13}\text{C}$  NMR spectrum of compound **20**.

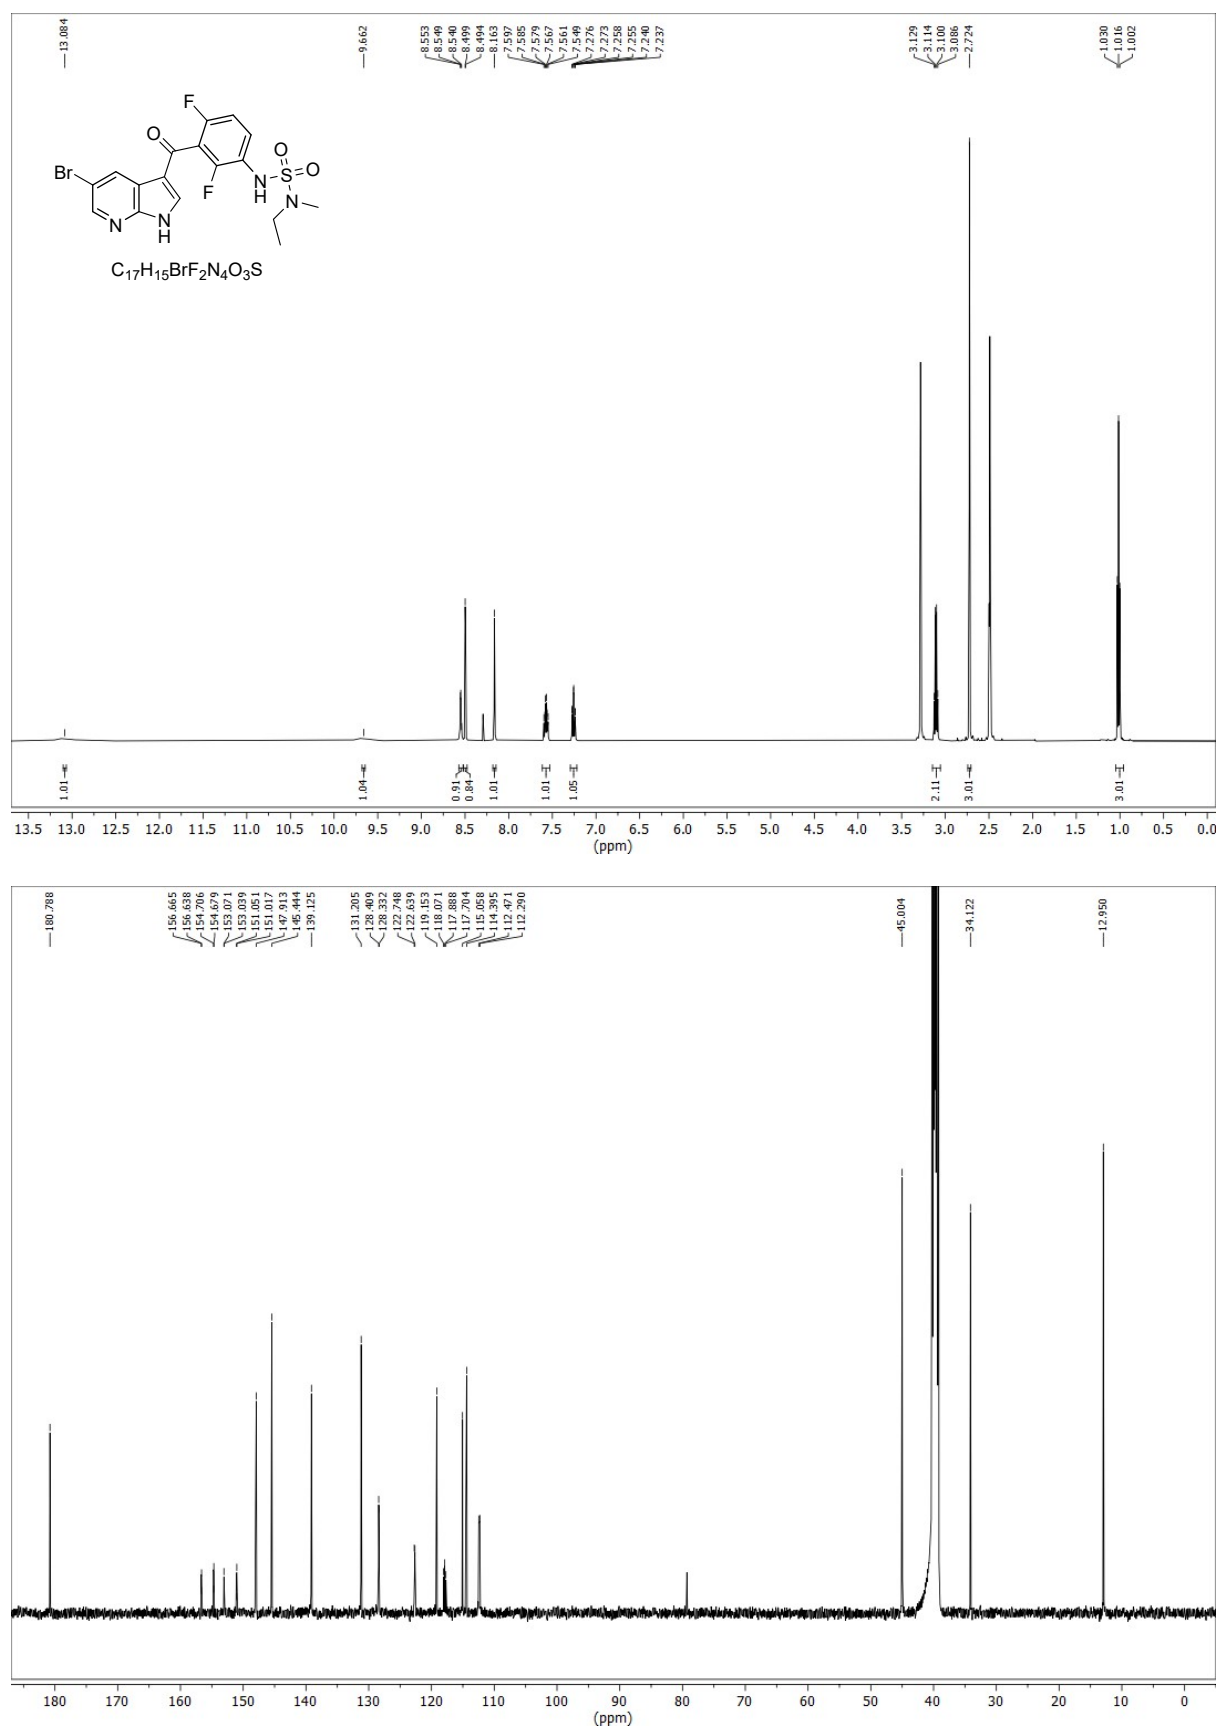

$^1\text{H}$  and  $^{13}\text{C}$  NMR spectrum of compound **21**.

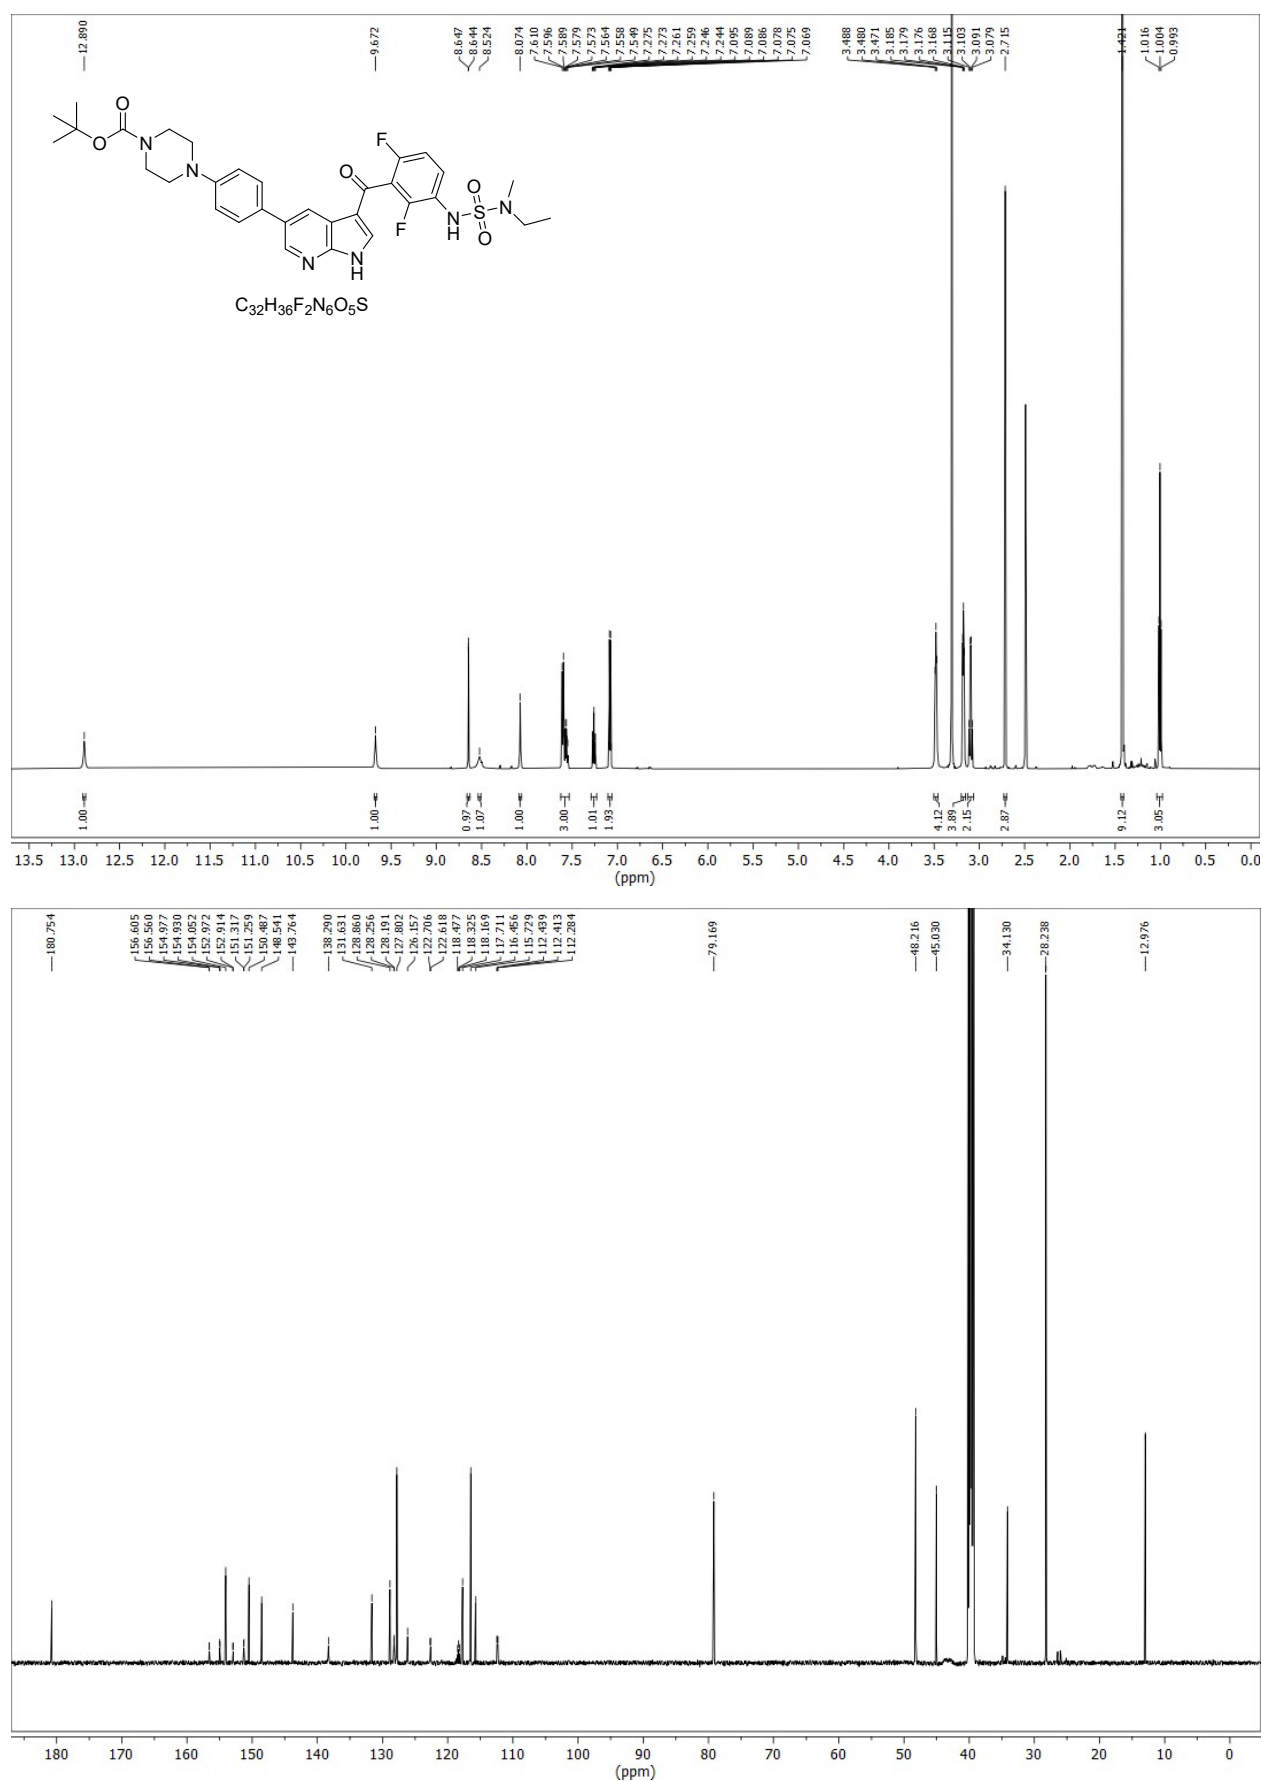

$^1\text{H}$  and  $^{13}\text{C}$  NMR spectrum of compound **23**.

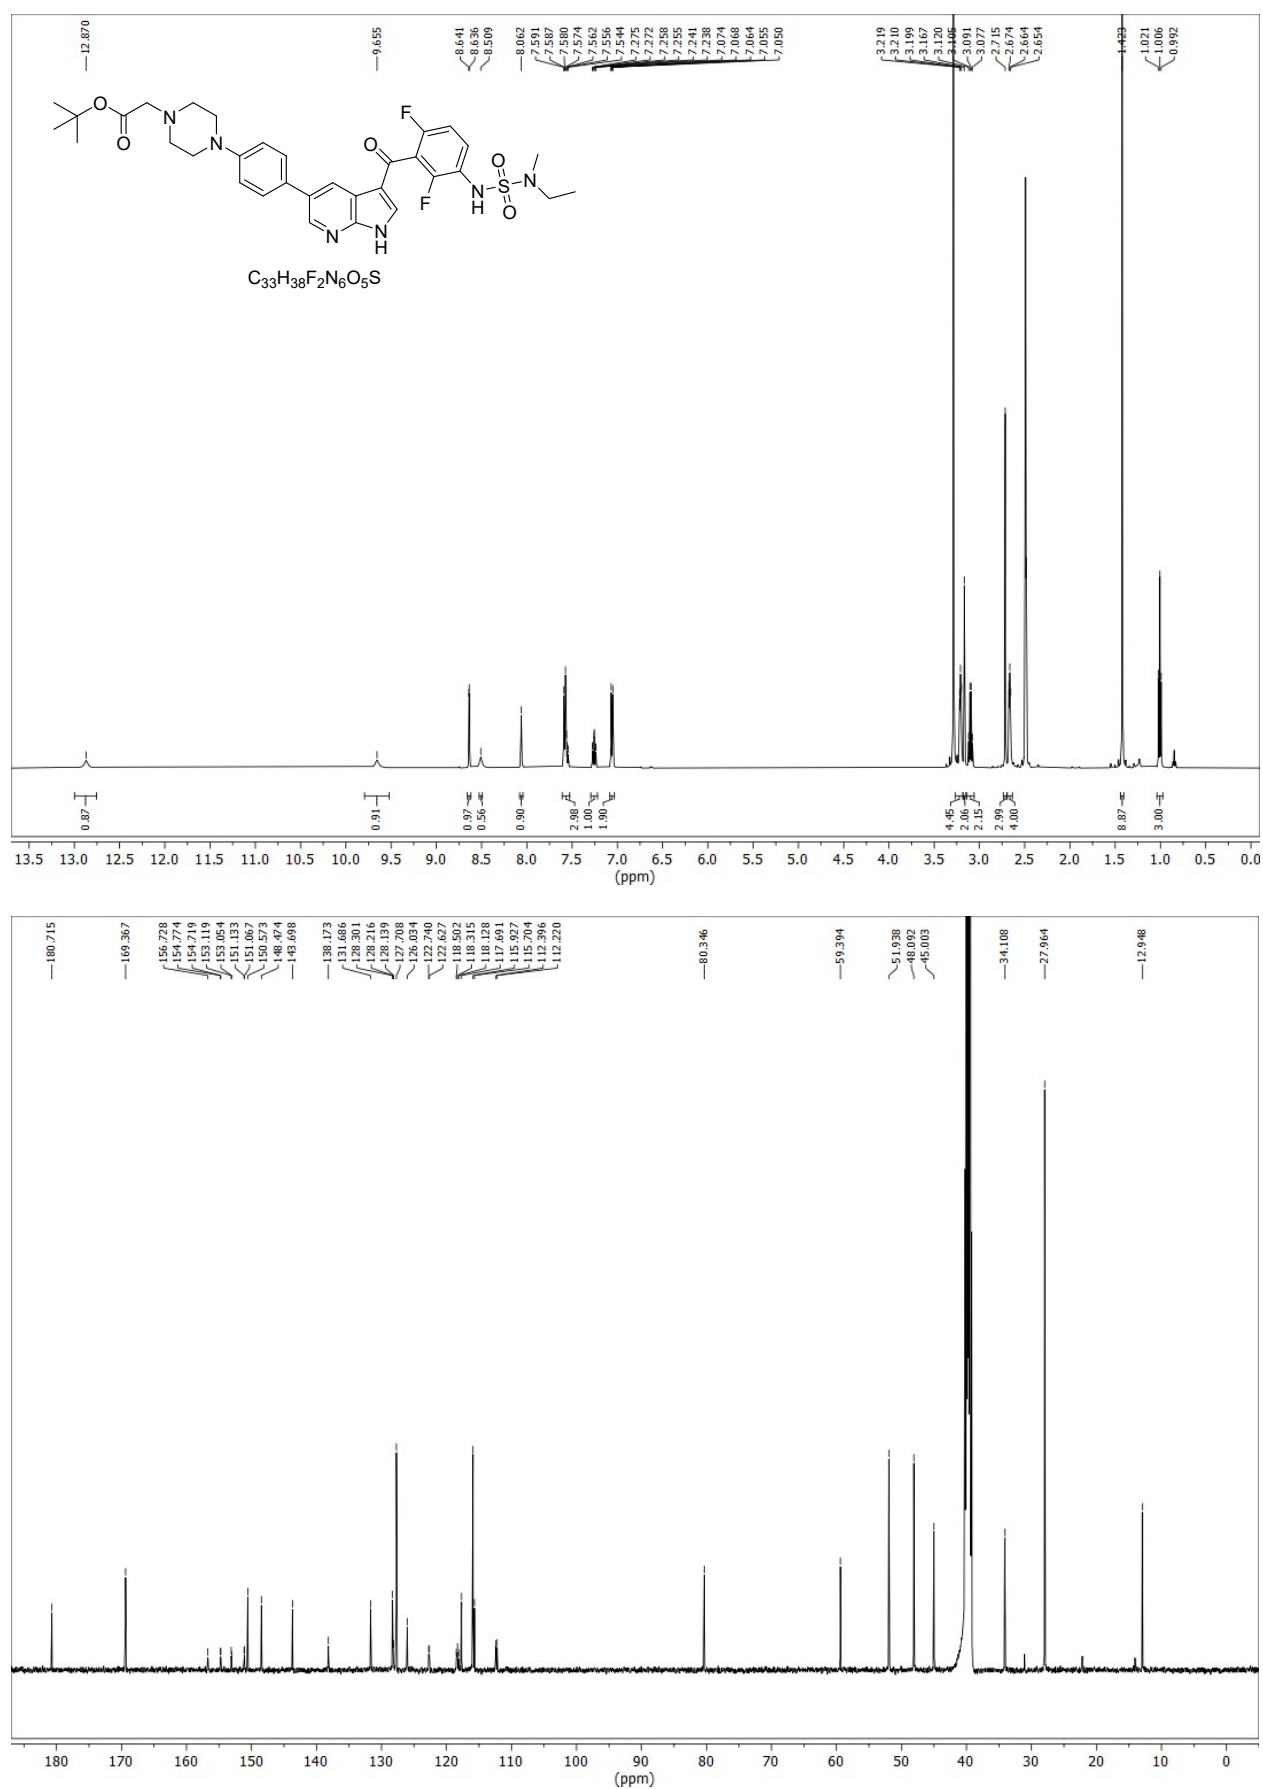

$^1\text{H}$  and  $^{13}\text{C}$  NMR spectrum of compound **25** (CST905).

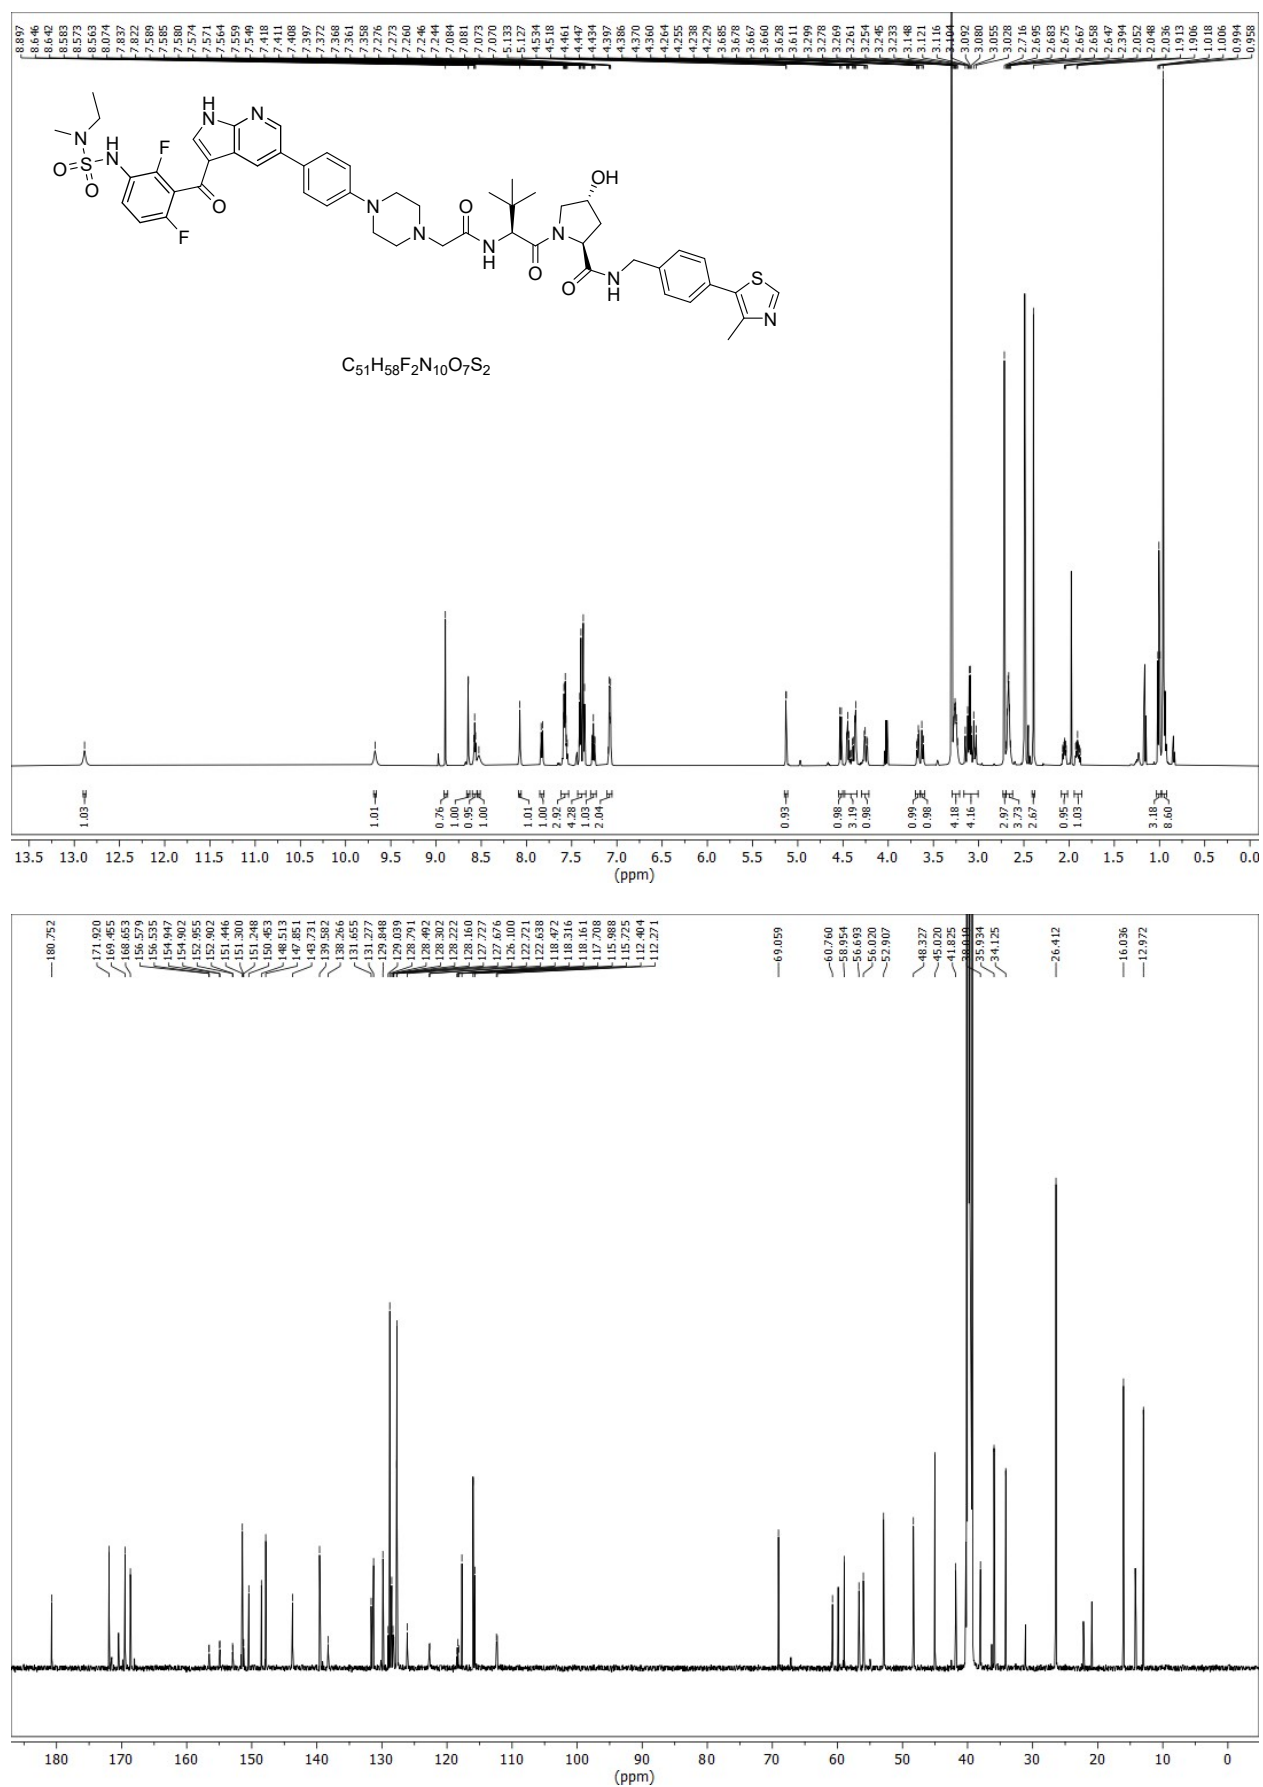

# LC/MS trace of compound **25** (CST905).

Sequence Name: 2021-05-20  
 Data file: CST905\_ACN.dx  
 Sample name: CST905\_ACN  
 Instrument: Single Quad  
 Inj. volume: 4.000  
 Acq. method: 0\_wasser-acn\_standard\_100-1500\_AC-20min.amx  
 Processing method: MS\_standard\_plot.pmx  
 Project Name: Single Quad  
 Operator : SYSTEM  
 Acquired on: 2021-05-20 13:17:01+02:00  
 Location: P2-C2

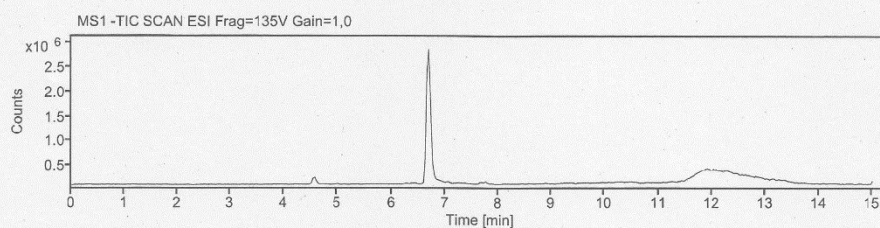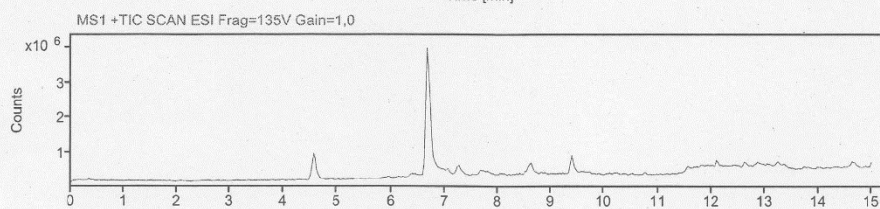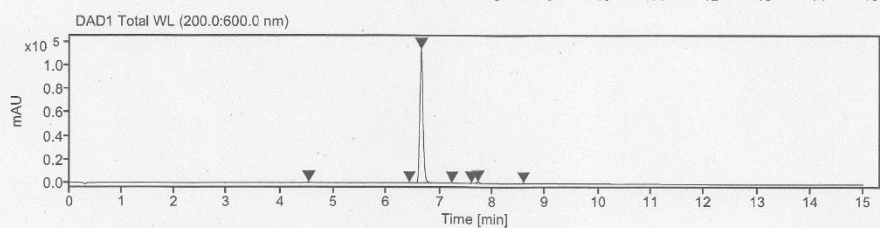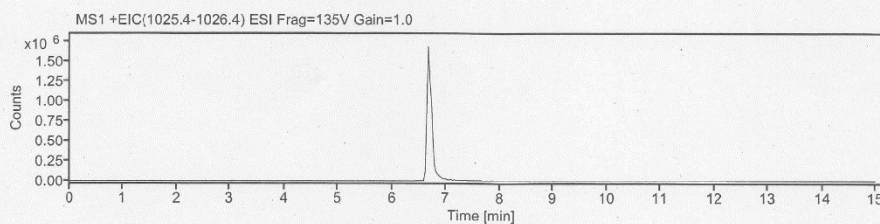

Signal: DAD1 Total WL (200.0:600.0 nm)

| RT [min] | Peak MS Base<br>Peak m/z | Area        | Area%   | Max Peak% | Height     |
|----------|--------------------------|-------------|---------|-----------|------------|
| 4.533    |                          | 2107.1410   | 0.4433  | 0.453     | 475.278    |
| 6.427    |                          | 394.5716    | 0.0830  | 0.085     | 53.132     |
| 6.652    |                          | 464872.5762 | 97.7948 | 100.000   | 114456.155 |
| 7.231    |                          | 612.1168    | 0.1288  | 0.132     | 103.973    |
| 7.596    |                          | 640.2079    | 0.1347  | 0.138     | 232.422    |
| 7.719    |                          | 6375.9051   | 1.3413  | 1.372     | 1392.385   |
| 8.586    |                          | 352.5678    | 0.0742  | 0.076     | 63.619     |
| Sum      |                          | 475355.0864 |         |           |            |

Signal: MS1 +TIC SCAN ESI Frag=135V Gain=1,0

| RT [min]          | Peak MS Base<br>Peak m/z | Area          | Area%    | Max Peak% | Height      |
|-------------------|--------------------------|---------------|----------|-----------|-------------|
| 6.684             | 1025.700                 | 17998135.1815 | 100.0000 | 100.000   | 3439289.954 |
| Sum 17998135.1815 |                          |               |          |           |             |

Signal: MS1 -TIC SCAN ESI Frag=135V Gain=1,0

| RT [min]          | Peak MS Base<br>Peak m/z | Area          | Area%    | Max Peak% | Height      |
|-------------------|--------------------------|---------------|----------|-----------|-------------|
| 6.690             | 1023.700                 | 14988115.2685 | 100.0000 | 100.000   | 2707454.474 |
| Sum 14988115.2685 |                          |               |          |           |             |

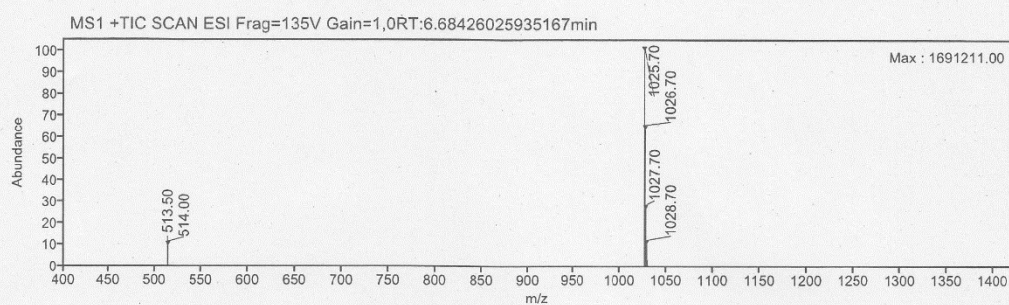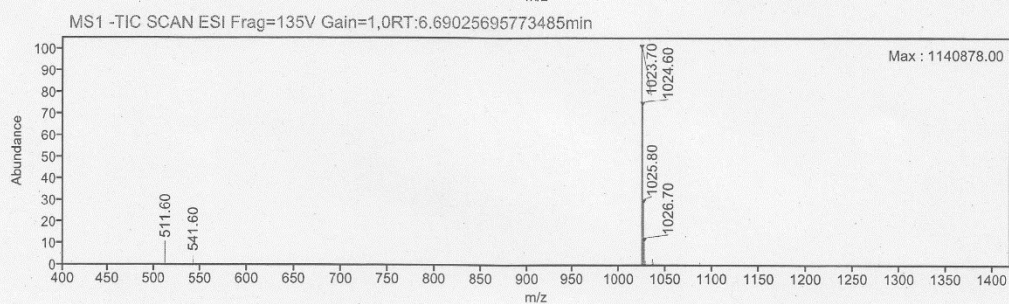

# HRMS spectrum of compound **25** (CST905).

## CST905

CST905 #21-29 RT: 0.09-0.13 AV: 9 NL: 1.40E7  
T: FTMS + c ESI Full ms [100.0000-1100.0000]

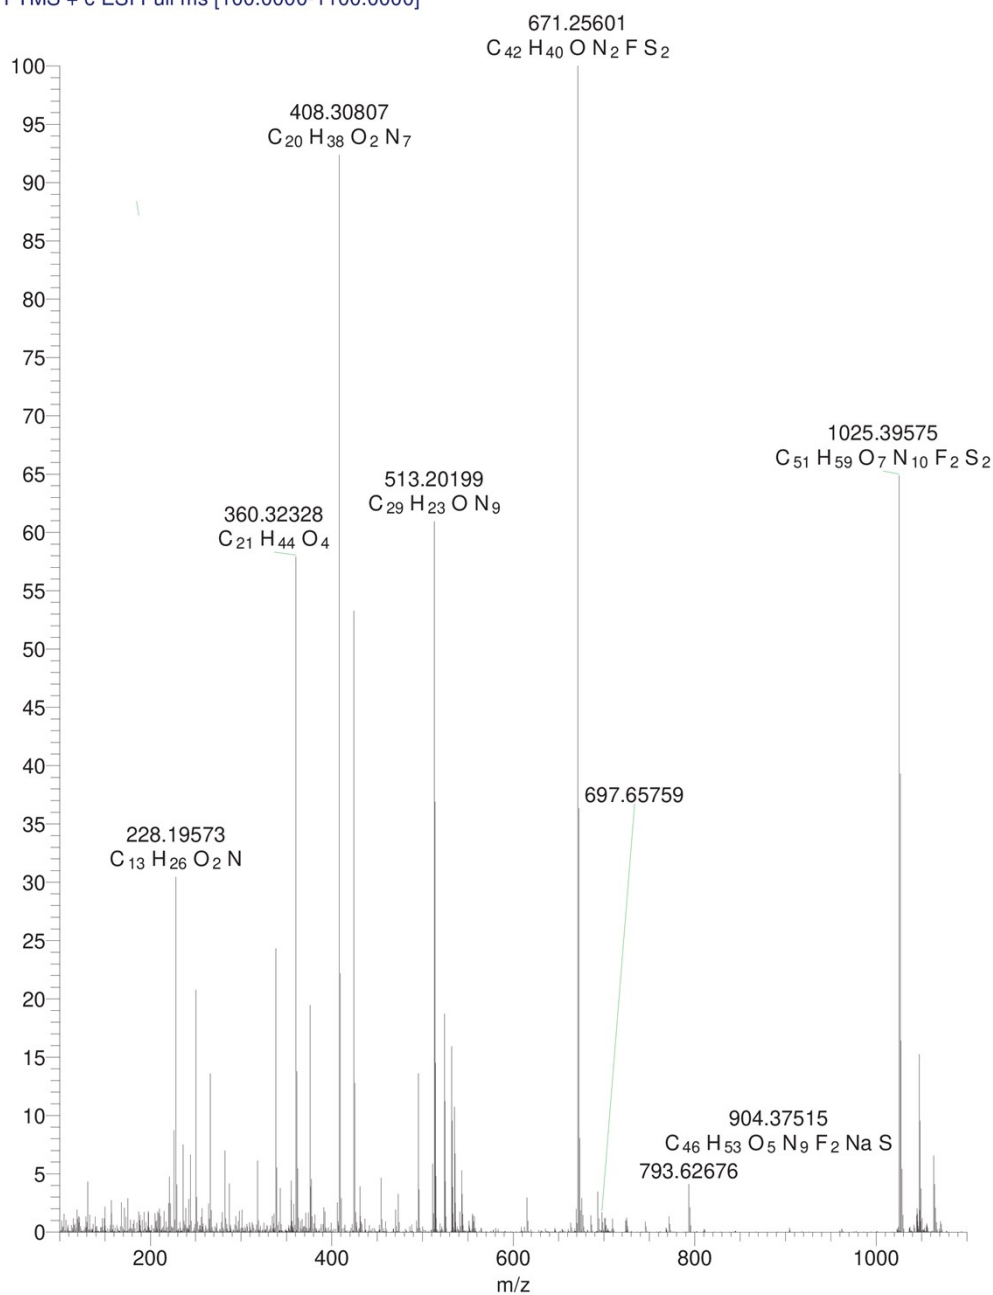

Elemental composition search on mass 1025.39575

$m/z$  = 1020.39575-1030.39575

| $m/z$      | Theo. Mass | Delta (ppm) | RDB equiv. | Composition                   |
|------------|------------|-------------|------------|-------------------------------|
| 1025.39575 | 1025.39722 | -1.43       | 26.5       | $C_{51}H_{59}O_7N_{10}F_2S_2$ |

## References

- 1 Z. Zhang, Z. Yang, H. Wong, J. Zhu, N. A. Meanwell, J. F. Kadow and T. Wang, *J. Org. Chem.*, 2002, **67**, 6226–6227.
- 2 S. K. Guchhait, M. Kashyap and H. Kamble, *J. Org. Chem.*, 2011, **76**, 4753–4758.
- 3 G. Bollag, P. Hirth, J. Tsai, J. Zhang, P. N. Ibrahim, H. Cho, W. Spevak, C. Zhang, Y. Zhang, G. Habets, E. A. Burton, B. Wong, G. Tsang, B. L. West, B. Powell, R. Shellooe, A. Marimuthu, H. Nguyen, K. Y. J. Zhang, D. R. Artis, J. Schlessinger, F. Su, B. Higgins, R. Iyer, K. D'Andrea, A. Koehler, M. Stumm, P. S. Lin, R. J. Lee, J. Grippo, I. Puzanov, K. B. Kim, A. Ribas, G. A. McArthur, J. A. Sosman, P. B. Chapman, K. T. Flaherty, X. Xu, K. L. Nathanson and K. Nolop, *Nature*, 2010, **467**, 596–599.
- 4 M. Grasso, M. A. Estrada, C. Ventocilla, M. Samanta, J. Maksimoska, J. Villanueva, J. D. Winkler and R. Marmorstein, *ACS Chem. Biol.*, 2016, **11**, 2876–2888.
- 5 T. Anastasiadis, S. W. Deacon, K. Devarajan, H. Ma and J. R. Peterson, *Nat. Biotechnol.*, 2011, **29**, 1039–1045.
- 6 A. Daina, O. Michielin and V. Zoete, *Sci. Rep.*, 2017, **7**, 42717.
- 7 E. H. Kerns, L. Di, S. Petusky, T. Kleintop, D. Huryn, O. McConnell and G. Carter, *J. Chromatogr. B*, 2003, **791**, 381–388.
- 8 C. Steinebach, Y. L. D. Ng, I. Susic, C.-S. Lee, S. Chen, S. Lindner, L. P. Vu, A. Bricelj, R. Haschemi, M. Monschke, E. Steinwarz, K. G. Wagner, G. Bendas, J. Luo, M. Gütschow and J. Krönke, *Chem. Sci.*, 2020, **11**, 3474–3486.
- 9 C. Steinebach, H. Kehm, S. Lindner, L. P. Vu, S. Köpff, Á. López Mármol, C. Weiler, K. G. Wagner, M. Reichenzeller, J. Krönke and M. Gütschow, *Chem. Commun.*, 2019, **55**, 1821–1824.
- 10 K. Valko, S. Nunhuck, C. Bevan, M. H. Abraham and D. P. Reynolds, *J. Pharm. Sci.*, 2003, **92**, 2236–2248.
- 11 H. Yao, Q. Sun and J. Zhu, *Arch. Pharm.*, 2016, **349**, 808–815.
- 12 X.-R. Han, L. Chen, Y. Wei, W. Yu, Y. Chen, C. Zhang, B. Jiao, T. Shi, L. Sun, C. Zhang, Y. Xu, M. R. Lee, Y. Luo, M. B. Plewe and J. Wang, *J. Med. Chem.*, 2020, **63**, 4069–4080.
- 13 C. Steinebach, S. A. Voell, L. P. Vu, A. Bricelj, I. Sosič, G. Schnakenburg and M. Gütschow, *Synthesis*, 2020, **52**, 2521–2527.
- 14 S. Jaime-Figueroa, A. D. Buhimschi, M. Toure, J. Hines and C. M. Crews, *Bioorg. Med. Chem. Lett.*, 2020, **30**, 126877.
- 15 C. Steinebach, I. Sosič, S. Lindner, A. Bricelj, F. Kohl, Y. L. D. Ng, M. Monschke, K. G. Wagner, J. Krönke and M. Gütschow, *Med. Chem. Commun.*, 2019, **10**, 1037–1041.
- 16 S. Alabi, S. Jaime-Figueroa, Z. Yao, Y. Gao, J. Hines, K. T. G. Samarasinghe, L. Vogt, N. Rosen and C. M. Crews, *Nat. Commun.*, 2021, **12**, 920.
